# Supplementary material
Source: publisher figshare collection journal article supplement (https://acs.figshare.com/ndownloader/files/25420785)
Supplement: Supplementary file 1 [file 25420785]

Supporting information for

# Highly C2/C1-Selective Covalent Organic Frameworks Substituted with Azo Groups

Shaofeng Huang<sup>†</sup>, Yiming Hu<sup>†</sup>, Lili Tan<sup>§</sup>, Shun Wan<sup>\*,‡</sup>, Sadegh Yazdi<sup>¶</sup>, Yinghua Jin<sup>\*,‡</sup>, Wei Zhang<sup>\*,†</sup>

<sup>†</sup>Department of Chemistry, University of Colorado, Boulder, Colorado 80309, United States

<sup>§</sup>State Key Laboratory of Solidification Processing, Center for Nano Energy Materials, School of Materials Science and Engineering, Northwestern Polytechnical University and Shaanxi Joint Laboratory of Graphene (NPU), Xi'an 710072, China

<sup>‡</sup>NCO Technologies, Longmont, Colorado 80501, United States

<sup>¶</sup>Renewable and Sustainable Energy Institute, University of Colorado Boulder, Boulder, Colorado, 80309, United States

\*To whom correspondence: wan@ncotechs.com; jinalice@yahoo.com; wei.zhang@colorado.edu

## Table of Contents

|                                                               |    |
|---------------------------------------------------------------|----|
| 1. Materials and general methods.....                         | 2  |
| 2. Experimental procedures .....                              | 3  |
| 3. Solid-State <sup>13</sup> C CP-MAS spectra of AzoCOFs..... | 7  |
| 4. FT-IR of AzoCOFs.....                                      | 9  |
| 5. Powder X-Ray Diffraction of AzoCOFs.....                   | 10 |
| 6. TGA of AzoCOFs.....                                        | 13 |
| 7. Additional adsorption data of AzoCOFs .....                | 15 |
| 8. Additional IAST calculation results of AzoCOFs .....       | 19 |
| 9. Estimation of adsorption heat of AzoCOFs.....              | 22 |
| 10. Gas adsorption properties of H-COF.....                   | 44 |
| 11. Estimation of adsorption heat of H-COF.....               | 46 |
| 12. TEM image of AzoCOF.....                                  | 49 |
| 13. NMR spectra of new compounds.....                         | 50 |
| Reference .....                                               | 54 |

## 1. Materials and general methods

All commercially available reagents and solvents were used as received without further purification, unless noted otherwise. Compound **1-H**<sup>1</sup>, **2**<sup>2</sup>, and triethylene glycol monomethyl ether tosylate<sup>3</sup> were synthesized following previously reported procedures without modification.

Flash column chromatography was performed by using a 100-150 times weight excess of flash silica gel 32-63  $\mu\text{m}$  from Dynamic Absorbants Inc. Fractions were analyzed by TLC using TLC silica gel F254 250  $\mu\text{m}$  precoated-plates from Dynamic Absorbants Inc.

NMR spectra were taken on Bruker 300 and Inova 500 spectrometers.  $\text{CHCl}_3$  (7.26 ppm) was used as an internal reference in  $^1\text{H}$  NMR, and  $\text{CHCl}_3$  (77.16 ppm) for  $^{13}\text{C}$  NMR. NMR data is reported in the following order: chemical shift, multiplicity (s, singlet; d, doublet; t, triplet; q, quartet; m, multiplet), coupling constants ( $J$ , Hz), number of protons. Solid-state cross polarization magic angle spinning (CP/MAS) NMR spectra were recorded on an Inova 400 NMR spectrometer. Powder X-Ray Diffraction (PXRD) was obtained from Inel CPS 120 diffraction system, using monochromated  $\text{Cu K}\alpha$  ( $\lambda=1.542 \text{ \AA}$ ) radiation. Elemental analysis (CHN) was performed at University of Illinois at Urbana Champaign. Microanalysis laboratory using Exeter analytical model CE440 CHN analyser.

The FT-IR spectra of starting materials and as-synthesized COFs were obtained from Agilent Technologies Cary 630 FT-IR. Thermogravimetric analyses (TGA) were performed on a thermogravimetric/differential thermal analyzer by heating the samples at  $10 \text{ }^\circ\text{C min}^{-1}$  to  $800 \text{ }^\circ\text{C}$  under nitrogen atmosphere.

The Quantachrome Autosorb ASiQ automated gas sorption analyzer was used to measure  $\text{N}_2$  adsorption isotherm. The samples were heated at  $120 \text{ }^\circ\text{C}$  and kept at this temperature for 24 h

under vacuum for activation. Ultra high purity grade (99.999% purity) N<sub>2</sub>, CO<sub>2</sub>, CH<sub>4</sub>, C<sub>2</sub>H<sub>2</sub>, C<sub>2</sub>H<sub>4</sub>, C<sub>2</sub>H<sub>6</sub> and He, oil-free valves and gas regulators were used for all free space corrections and measurements. For the gas adsorption measurement, the temperatures were controlled by using a refrigerated bath of liquid N<sub>2</sub> (77 K), ice water (273K) and water (295K). The pore size distribution is calculated with Quenched Solid Density Functional Theory (QSDFT) and cylindrical pore model based on the nitrogen sorption isotherms at 77 K using Quantachrome AsiQwin program.

Transmission Electron Microscopy images were obtained on a FEI Tecnai T12, 120 kV TEM.

## 2. Experimental procedures

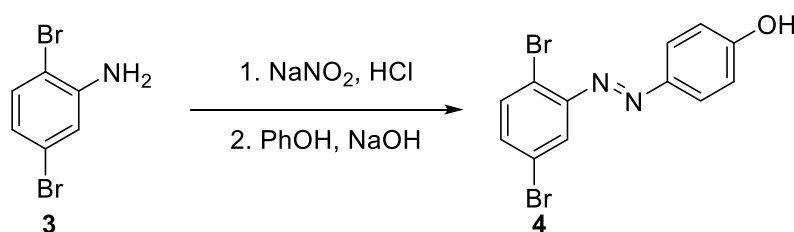

**Synthesis of compound 4:** The starting material **3** (2.51 g, 10.0 mmol) was dissolved in HCl (1 M, 20 mL, 20 mmol, 2.0 eq.), and the solution was cooled to 0 °C. The aqueous solution of NaNO<sub>2</sub> (690 mg, 10.0 mmol, 1.0 eq.) in water (10 mL) was added dropwise. The suspension was stirred at 0 °C for 1 h. To the resulting yellow solution was added a solution of phenol (940 mg, 10.0 mmol) in an aqueous NaOH solution (400 mg, 10.0 mmol, in 5 mL water, 1.0 eq.) dropwise. The mixture turned to dark red and turbid. The suspension was stirred at 0 °C for 2 h and at room temperature for 24 h. The suspension was filtered and the solid was washed with water (100 mL) and dried *in vacuo*. The crude product was purified by flash column chromatography (EtOAc/hexane = 1:20 v:v). The pure compound **4** was obtained as a dark red solid (2.40 g, 70%): <sup>1</sup>H NMR (300 MHz, Chloroform-*d*) δ 7.94 (d, *J* = 9.0 Hz, 2H), 7.80 (d, *J* = 2.4 Hz, 1H), 7.59 (d, *J*

= 8.5 Hz, 1H), 7.39 (dd,  $J$  = 8.5, 2.4 Hz, 1H), 6.96 (d,  $J$  = 9.0 Hz, 2H), 5.17 (s, 1H).  $^{13}\text{C}$  NMR (75 MHz,  $\text{CDCl}_3$ )  $\delta$  159.29, 150.36, 147.26, 134.90, 133.92, 126.10, 124.03, 122.12, 121.15, 116.14.

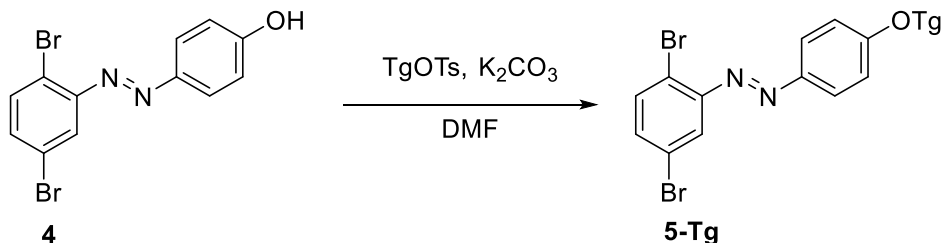

**Synthesis of compound 5-Tg:** A suspension of the compound **4** (1.03 g, 3.0 mmol), triethylene glycol monomethyl ether tosylate (954 mg, 3.0 mmol, 1.0 eq.) and  $\text{K}_2\text{CO}_3$  (414 mg, 3.0 mmol, 1.0 eq.) in DMF (15 mL) was heated at 80 °C for 16 h. Water (100 mL) was added and the product was extracted with EtOAc until the aqueous phase turned to colorless. The organic extracts were combined and all the volatiles were removed under reduced pressure. The crude product was purified by flash column chromatography (EtOAc/hexane = 1:2 v:v). The pure compound **5-Tg** was obtained as a dark red oil (1.25 g, 93%):  $^1\text{H}$  NMR (300 MHz,  $\text{Chloroform-}d$ )  $\delta$  7.95 (d,  $J$  = 9.0 Hz, 2H), 7.79 (d,  $J$  = 2.4 Hz, 1H), 7.58 (d,  $J$  = 8.5 Hz, 1H), 7.38 (dd,  $J$  = 8.5, 2.4 Hz, 1H), 7.03 (d,  $J$  = 9.0 Hz, 2H), 4.26 – 4.19 (m, 2H), 3.94 – 3.87 (m, 2H), 3.78 – 3.73 (m, 2H), 3.72 – 3.64 (m, 4H), 3.58 – 3.53 (m, 2H), 3.38 (s, 3H).  $^{13}\text{C}$  NMR (75 MHz,  $\text{CDCl}_3$ )  $\delta$  162.36, 150.36, 147.08, 134.85, 133.81, 125.78, 124.01, 122.08, 121.09, 115.12, 72.06, 71.04, 70.81, 70.73, 69.70, 67.94, 59.18.

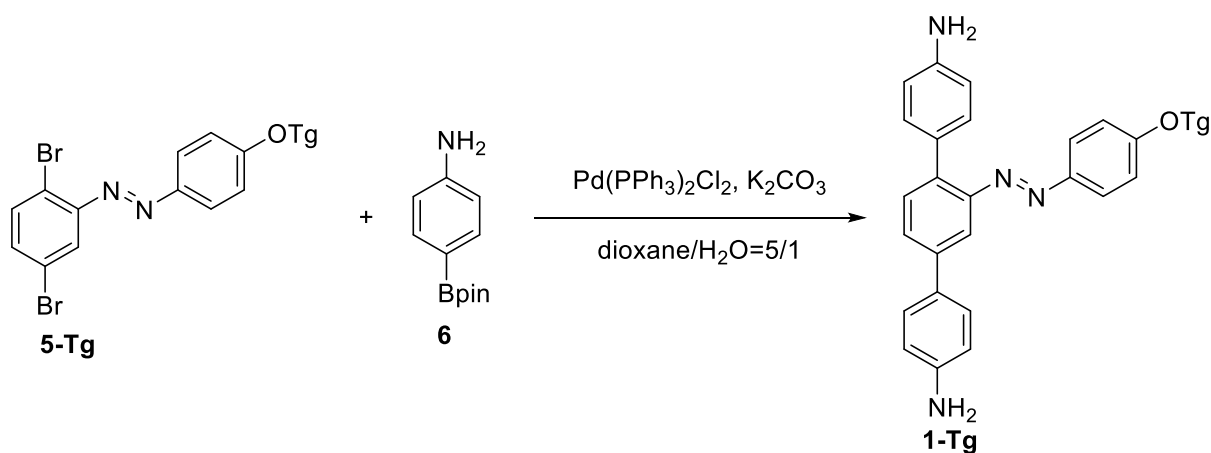

**Synthesis of compound 1-Tg:** A typical Suzuki coupling procedure was used for the synthesis of compound **1-Tg**. A flame-dried 100 mL Schlenk tube was charged with **5-Tg** (1.34 g, 2.75 mmol), **6** (1.58 g, 7.2 mmol, 2.6 eq.),  $\text{Pd(PPh}_3)_2\text{Cl}_2$  (70 mg, 0.1 mmol, 0.04 eq.) and  $\text{K}_2\text{CO}_3$  (1.24 g, 9.0 mmol, 3.3 eq.). A mixture of dioxane (45 mL) and  $\text{H}_2\text{O}$  (9 mL) was bubbled with  $\text{N}_2$  for 20 min and added to the Schlenk tube. The suspension was heated at 110 °C for 16 h under nitrogen. Water (50 mL) was added and the product was extracted with EtOAc until the aqueous phase turned to colorless. The organic extracts were combined and all the volatiles were removed under reduced pressure. The crude product was purified by flash column chromatography ( $\text{MeCN/CH}_2\text{Cl}_2$ =1:4 v:v). The pure product **1-Tg** was obtained as an orange solid (926 mg, 64 %):  $^1\text{H}$  NMR (500 MHz, Chloroform-*d*)  $\delta$  7.85 (d,  $J$  = 2.0 Hz, 1H), 7.83 (d,  $J$  = 8.9 Hz, 2H), 7.67 (dd,  $J$  = 8.0, 2.0 Hz, 1H), 7.57 (d,  $J$  = 8.1 Hz, 1H), 7.52 (d,  $J$  = 8.5 Hz, 2H), 7.31 (d,  $J$  = 8.4 Hz, 2H), 6.99 (d,  $J$  = 9.0 Hz, 2H), 6.80 – 6.72 (m, 4H), 4.23 – 4.17 (m, 3H), 3.92 – 3.86 (m, 2H), 3.79 – 3.72 (m, 6H), 3.73 – 3.67 (m, 2H), 3.68 – 3.64 (m, 2H), 3.58 – 3.53 (m, 2H), 3.38 (s, 3H).  $^{13}\text{C}$  NMR (75 MHz,  $\text{CDCl}_3$ )  $\delta$  161.17, 150.01, 147.70, 146.15, 145.78, 140.16, 138.58, 132.10, 130.92, 130.82, 129.14, 128.19, 128.14, 125.18, 72.08, 71.04, 70.82, 70.74, 69.79, 67.85, 59.20.

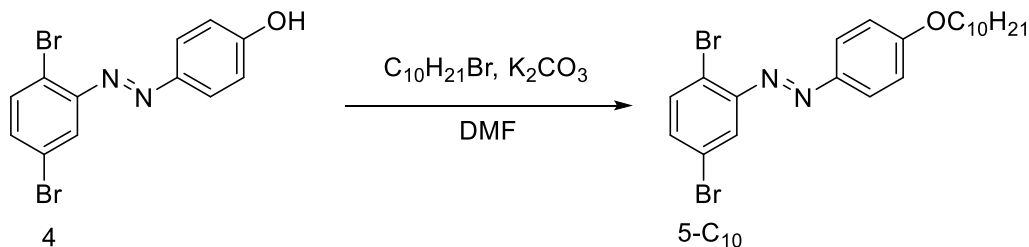

**Synthesis of compound 5-C<sub>10</sub>:** A suspension of the compound **4** (684 mg, 2.0 mmol), 1-bromodecane (442 mg, 2.0 mmol, 1.0 eq.) and K<sub>2</sub>CO<sub>3</sub> (276 mg, 2.0 mmol, 1.0 eq.) in DMF (10 mL) was heated at 80 °C for 16 h. Water (100 mL) was added and the product was extracted with EtOAc until the aqueous phase turned to colorless. The organic extracts were combined and all the volatiles were removed under a reduced pressure. The crude product was purified by flash column chromatography (pure hexane). The mixture of compound **5-C<sub>10</sub>** and 1-bromodecane was obtained as a red oil, which was used directly in the following step without further purification.

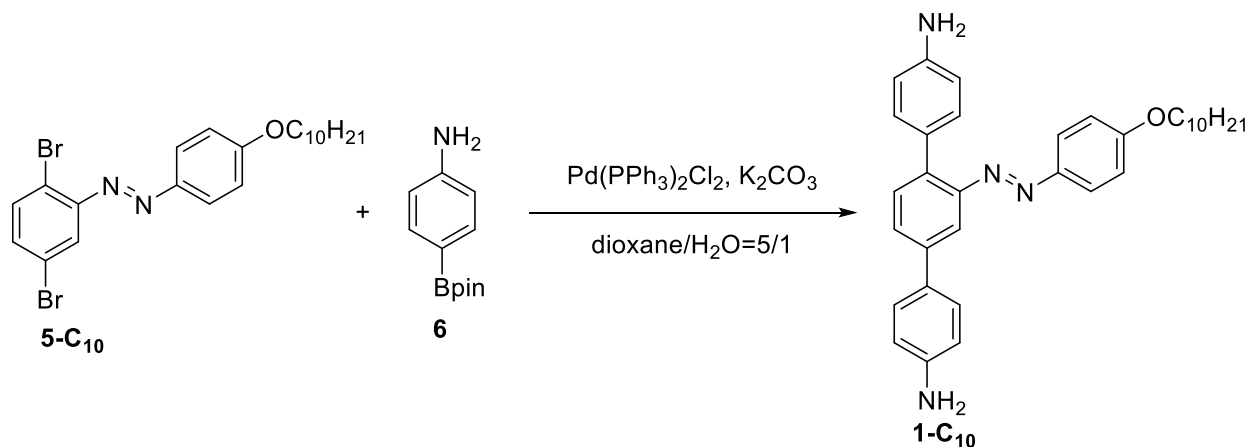

**Synthesis of compound 1-C<sub>10</sub>:** A typical Suzuki coupling procedure described above was used for the synthesis of compound **1-C<sub>10</sub>**. The coupling of the compound **5-C<sub>10</sub>** (595 mg, 1.34 mmol) and the compound **6** (703 mg, 3.2 mmol, 2.4 eq.) in dioxane (20 mL) and H<sub>2</sub>O (4 mL) in the presence of Pd(PPh<sub>3</sub>)<sub>2</sub>Cl<sub>2</sub> (47 mg, 0.07 mmol, 0.05 eq.) and K<sub>2</sub>CO<sub>3</sub> (552 mg, 4 mmol, 3 eq.) yielded the product **1-C<sub>10</sub>** as an orange solid (490 mg, 70 %): <sup>1</sup>H NMR (300 MHz, Chloroform-*d*) δ 7.86

(d,  $J = 2.0$  Hz, 1H), 7.84 (d,  $J = 8.9$  Hz, 2H), 7.67 (dd,  $J = 8.1, 2.0$  Hz, 1H), 7.57 (d,  $J = 8.1$  Hz, 1H), 7.53 (d,  $J = 8.5$  Hz, 2H), 7.32 (d,  $J = 8.5$  Hz, 2H), 6.97 (d,  $J = 9.0$  Hz, 2H), 6.81 – 6.72 (m, 4H), 4.03 (t,  $J = 6.6$  Hz, 2H), 1.90 – 1.73 (m, 2H), 1.30 (m, 14H), 0.98 – 0.76 (m, 3H).  $^{13}\text{C}$  NMR (75 MHz,  $\text{CDCl}_3$ )  $\delta$  161.60, 150.06, 147.47, 146.13, 145.76, 140.15, 138.49, 132.10, 130.94, 130.79, 129.17, 128.14, 128.10, 125.22, 115.51, 114.80, 114.58, 113.61, 68.48, 32.03, 29.70, 29.52, 29.46, 29.33, 26.15, 25.00, 22.82, 14.26.

### 3. Solid-State $^{13}\text{C}$ CP-MAS spectra of AzoCOFs

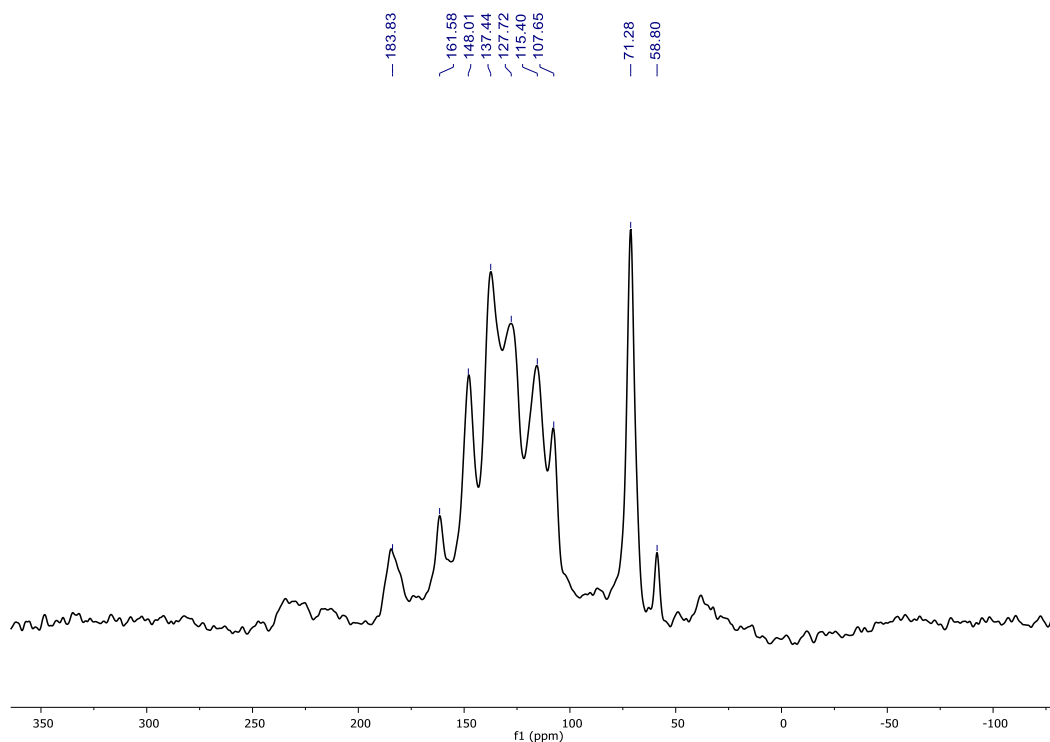

**Figure S1.**  $^{13}\text{C}$  CP/MAS NMR spectrum of **Tg-AzoCOF**.

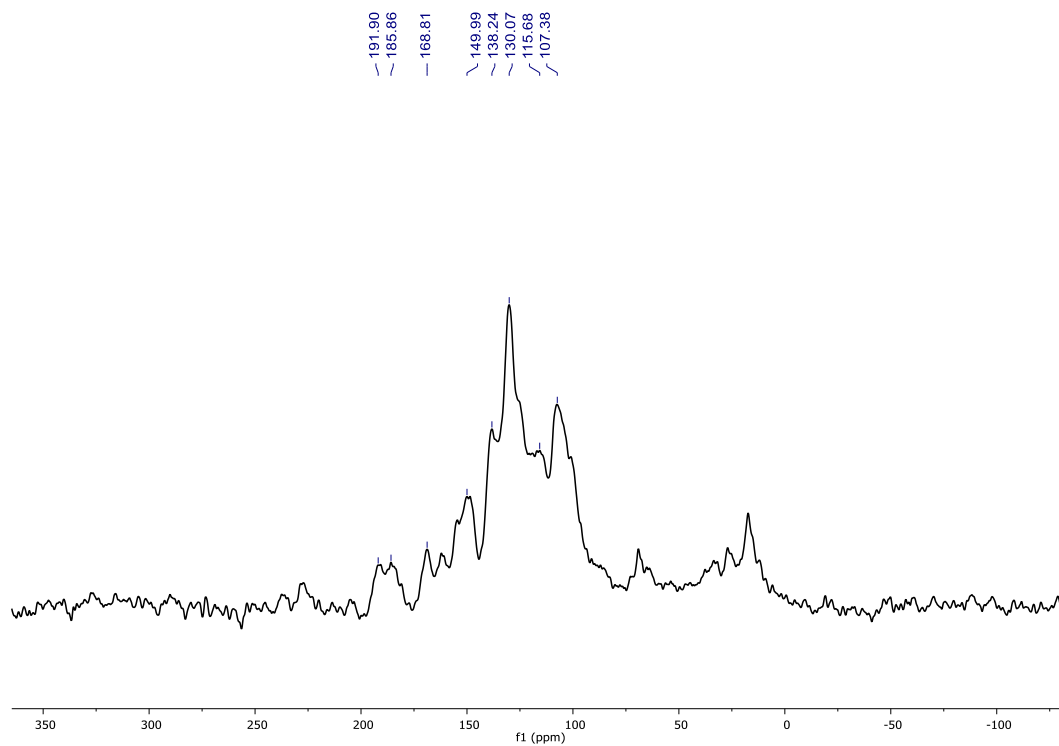

**Figure S2.**  $^{13}\text{C}$  CP/MAS NMR spectrum of **H-AzoCOF**.

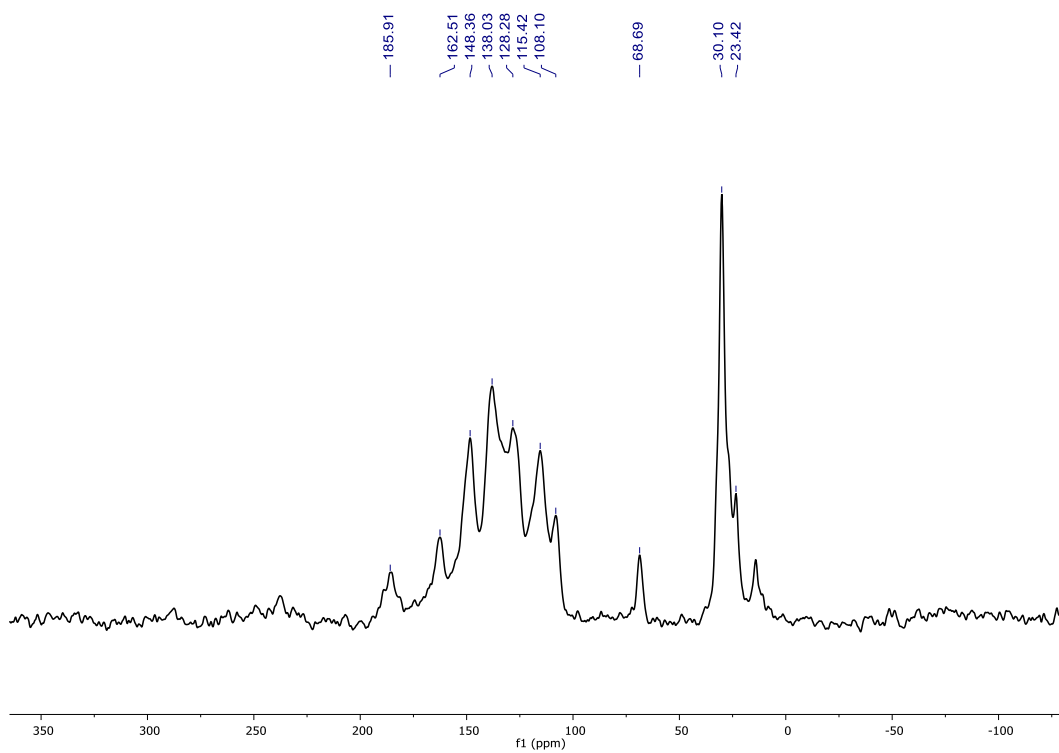

**Figure S3.**  $^{13}\text{C}$  CP/MAS NMR spectrum of **C<sub>10</sub>-AzoCOF**.



#### 4. FT-IR of AzoCOFs

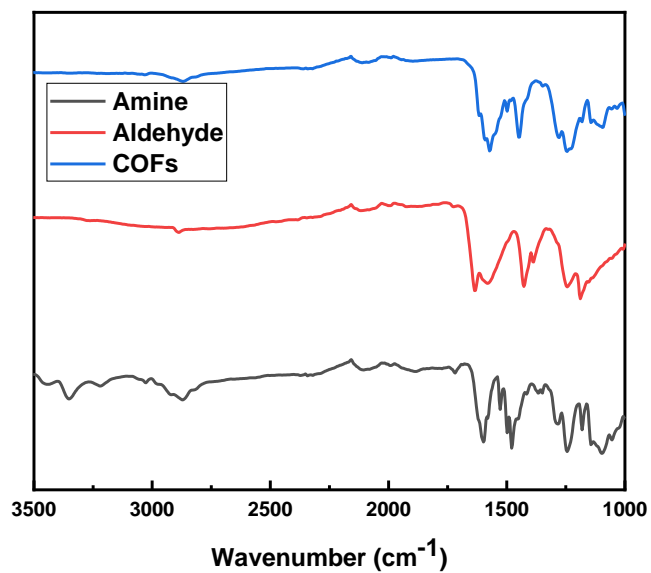

**Figure S4.** FT-IR spectra of diamine **1-Tg** (black), trialdehyde **2** (red), and **Tg-AzoCOF** (blue).

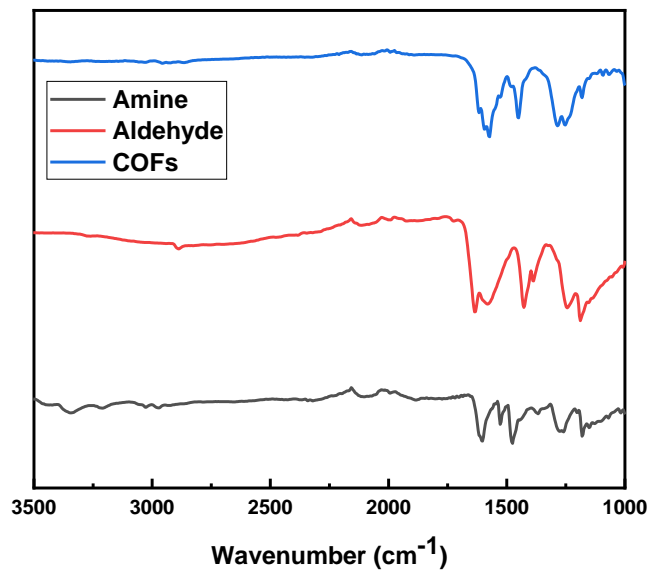

**Figure S5.** FT-IR spectra of diamine **1-H** (black), trialdehyde **2** (red), and **H-AzoCOF** (blue).

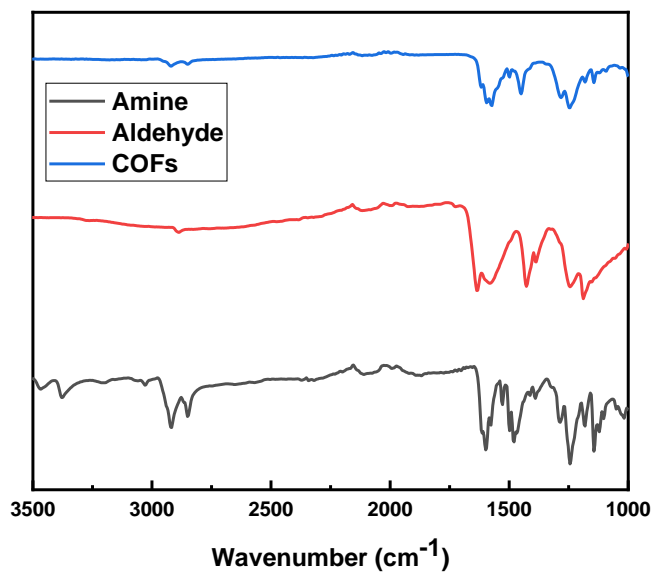

**Figure S6.** FT-IR spectra of diamine **1**-C<sub>10</sub> (black), trialdehyde **2** (red), and C<sub>10</sub>-AzoCOF (blue).

## 5. Powder X-Ray Diffraction of AzoCOFs

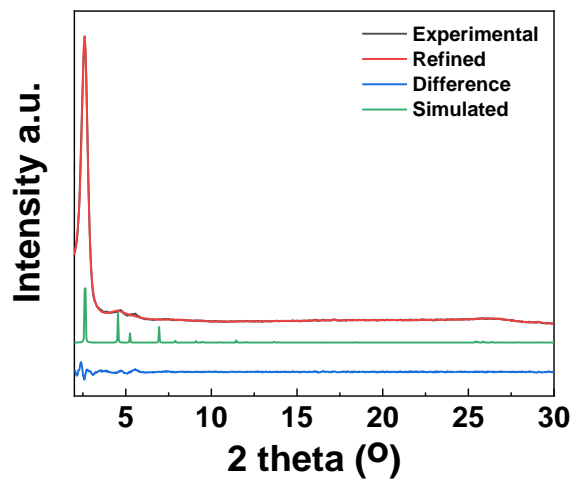

**Figure S7.** PXRD analysis of **H-AzoCOF**: Observed PXRD patterns (black) refined modeling profile (red), simulated PXRD patterns (green) and difference between the observed PXRD and refined modeling patterns (blue).

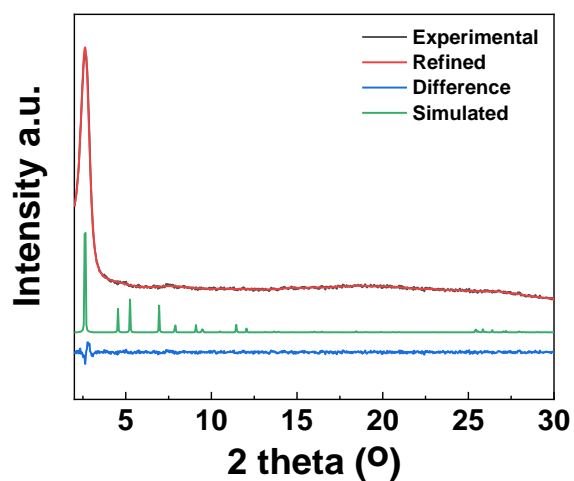

**Figure S8.** PXRD analysis of **C<sub>10</sub>-AzoCOF**: Observed PXRD patterns (black) refined modeling profile (red), simulated PXRD patterns (green) and difference between the observed PXRD and refined modeling patterns (blue).

**Table S1.** Fractional atomic coordinates of **Tg-AzoCOF** unit cell.

| Atom | X       | Y       | Z       | Atom | X       | Y        | Z       |
|------|---------|---------|---------|------|---------|----------|---------|
| N1   | 1.90437 | 0.01672 | 0.3707  | C25  | 1.62518 | -0.04507 | 0.37664 |
| C2   | 1.88561 | 0.04212 | 0.38106 | C26  | 1.63725 | -0.07312 | 0.43594 |
| C3   | 1.90772 | 0.08423 | 0.36667 | C27  | 1.6775  | -0.05968 | 0.51769 |
| C4   | 1.889   | 0.10802 | 0.37433 | C28  | 1.70502 | -0.01902 | 0.53415 |
| C5   | 1.84709 | 0.09152 | 0.39671 | C29  | 1.58683 | 0.31839  | 0.35133 |
| C6   | 1.82517 | 0.04932 | 0.41115 | C30  | 1.62481 | 0.32508  | 0.32703 |
| C7   | 1.8438  | 0.02541 | 0.40362 | C31  | 1.63352 | 0.29146  | 0.31558 |
| C8   | 1.82749 | 0.11837 | 0.40159 | O32  | 1.60679 | 0.25678  | 0.29947 |
| C9   | 1.85154 | 0.16039 | 0.37489 | C33  | 2.08676 | 0.0534   | 0.34171 |
| C10  | 1.83543 | 0.18638 | 0.37206 | C34  | 2.04556 | 0.03002  | 0.31449 |
| C11  | 1.79402 | 0.17175 | 0.39468 | C35  | 2.01496 | 0.04382  | 0.29617 |
| C12  | 1.77021 | 0.13054 | 0.42327 | O36  | 2.05481 | -0.02491 | 0.25785 |
| C13  | 1.78554 | 0.10418 | 0.42919 | O37  | 0.27842 | 0.39203  | 1.39491 |
| C14  | 1.77488 | 0.19802 | 0.3897  | C38  | 0.24125 | 0.38309  | 1.56135 |
| C15  | 1.79782 | 0.23982 | 0.3947  | C39  | 0.20594 | 0.35115  | 1.34108 |
| C16  | 1.77981 | 0.26382 | 0.39274 | O40  | 0.1707  | 0.34642  | 1.49434 |
| C17  | 1.73816 | 0.24741 | 0.3846  | C41  | 0.14164 | 0.30844  | 1.37997 |
| C18  | 1.71479 | 0.20563 | 0.37859 | C42  | 0.10225 | 0.30725  | 1.3354  |
| C19  | 1.73293 | 0.18153 | 0.38189 | O43  | 0.07295 | 0.26904  | 1.22985 |

|     |         |          |         |     |          |         |         |
|-----|---------|----------|---------|-----|----------|---------|---------|
| N20 | 1.72191 | 0.27433  | 0.38135 | C44 | 0.03939  | 0.2724  | 1.16078 |
| N21 | 1.75736 | 0.06258  | 0.4577  | C45 | 0.00437  | 0.23181 | 1.06849 |
| N22 | 1.72007 | 0.05009  | 0.47259 | O46 | -0.02907 | 0.2353  | 0.99709 |
| C23 | 1.69266 | 0.00888  | 0.47276 | C47 | -0.05875 | 0.19689 | 0.90282 |
| C24 | 1.65261 | -0.00436 | 0.3973  |     |          |         |         |

**Table S2.** Fractional atomic coordinates of **H-AzoCOF** unit cell.

| Atom | X       | Y       | Z        | Atom | X       | Y        | Z        |
|------|---------|---------|----------|------|---------|----------|----------|
| N1   | 1.90505 | 0.0174  | -0.03325 | C19  | 1.73277 | 0.18157  | 0.00945  |
| C2   | 1.88619 | 0.04257 | -0.02111 | N20  | 1.7233  | 0.27539  | -0.05576 |
| C3   | 1.90816 | 0.08462 | -0.04072 | N21  | 1.75821 | 0.06138  | 0.07919  |
| C4   | 1.88932 | 0.10821 | -0.03099 | N22  | 1.72123 | 0.04882  | 0.12656  |
| C5   | 1.84747 | 0.09143 | -0.0007  | C23  | 1.69299 | 0.0079   | 0.10818  |
| C6   | 1.82574 | 0.04929 | 0.01891  | C24  | 1.65259 | -0.00435 | 0.14204  |
| C7   | 1.84448 | 0.02561 | 0.0089   | C25  | 1.62403 | -0.04475 | 0.12641  |
| C8   | 1.82762 | 0.11788 | 0.00678  | C26  | 1.6358  | -0.07311 | 0.07744  |
| C9   | 1.85119 | 0.15973 | -0.03607 | C27  | 1.67613 | -0.06108 | 0.04378  |
| C10  | 1.83472 | 0.18534 | -0.04102 | C28  | 1.70468 | -0.02069 | 0.05895  |
| C11  | 1.79343 | 0.17064 | -0.00306 | C29  | 1.5855  | 0.31648  | -0.03545 |
| C12  | 1.76999 | 0.12939 | 0.04332  | C30  | 1.62386 | 0.32397  | -0.02362 |
| C13  | 1.78581 | 0.10325 | 0.05095  | C31  | 1.63361 | 0.2911   | -0.01201 |
| C14  | 1.77453 | 0.19723 | -0.01617 | O32  | 1.60758 | 0.25639  | 0.02259  |
| C15  | 1.79779 | 0.23884 | -0.05643 | C33  | 2.08578 | 0.05218  | -0.06171 |
| C16  | 1.78042 | 0.26342 | -0.06964 | C34  | 2.04477 | 0.02931  | -0.08818 |
| C17  | 1.73898 | 0.24789 | -0.04422 | C35  | 2.01493 | 0.04386  | -0.10581 |
| C18  | 1.71525 | 0.20629 | -0.00392 | O36  | 2.05311 | -0.02604 | -0.1436  |

**Table S3.** Fractional atomic coordinates of **C<sub>10</sub>-AzoCOF** unit cell.

| Atom | X       | Y       | Z       | Atom | X       | Y        | Z       |
|------|---------|---------|---------|------|---------|----------|---------|
| N1   | 1.90382 | 0.01679 | 0.37486 | C25  | 1.62303 | -0.04391 | 0.38448 |
| C2   | 1.88493 | 0.04206 | 0.38558 | C26  | 1.63411 | -0.07274 | 0.43833 |
| C3   | 1.90691 | 0.08415 | 0.36986 | C27  | 1.67415 | -0.0604  | 0.51893 |
| C4   | 1.88806 | 0.1078  | 0.37804 | C28  | 1.70246 | -0.01995 | 0.53927 |
| C5   | 1.84614 | 0.09112 | 0.40242 | C29  | 1.58629 | 0.31839  | 0.35894 |
| C6   | 1.82437 | 0.04894 | 0.41806 | C30  | 1.62425 | 0.32502  | 0.33514 |
| C7   | 1.84313 | 0.0252  | 0.40993 | C31  | 1.63292 | 0.29138  | 0.32373 |
| C8   | 1.82641 | 0.11779 | 0.40816 | O32  | 1.60617 | 0.25673  | 0.30723 |
| C9   | 1.85039 | 0.15978 | 0.38115 | C33  | 2.08604 | 0.05329  | 0.34557 |

|     |         |         |         |     |          |          |         |
|-----|---------|---------|---------|-----|----------|----------|---------|
| C10 | 1.83423 | 0.18571 | 0.3789  | C34 | 2.04485  | 0.02995  | 0.31831 |
| C11 | 1.79287 | 0.1711  | 0.40238 | C35 | 2.01432  | 0.04382  | 0.30008 |
| C12 | 1.76911 | 0.1299  | 0.43149 | O36 | 2.05403  | -0.02498 | 0.26193 |
| C13 | 1.78447 | 0.10353 | 0.43696 | O37 | 0.28239  | 0.39521  | 1.3898  |
| C14 | 1.7738  | 0.19741 | 0.39743 | C38 | 0.24578  | 0.38805  | 1.55564 |
| C15 | 1.79681 | 0.2392  | 0.40127 | C39 | 0.20969  | 0.35595  | 1.34604 |
| C16 | 1.77891 | 0.26328 | 0.39899 | C40 | 0.17409  | 0.36069  | 1.43073 |
| C17 | 1.73729 | 0.24699 | 0.39167 | C41 | 0.13663  | 0.32464  | 1.28819 |
| C18 | 1.71384 | 0.20522 | 0.38688 | C42 | 0.10268  | 0.3332   | 1.30141 |
| C19 | 1.73187 | 0.18102 | 0.39048 | C43 | 0.06442  | 0.29641  | 1.18582 |
| N20 | 1.72116 | 0.274   | 0.3881  | C44 | 0.03164  | 0.3066   | 1.15875 |
| N21 | 1.75623 | 0.06191 | 0.46567 | C45 | -0.00706 | 0.26974  | 1.05488 |
| N22 | 1.71904 | 0.04974 | 0.4838  | C46 | -0.03924 | 0.2806   | 1.01058 |
| C23 | 1.69102 | 0.00871 | 0.48307 | C47 | -0.07807 | 0.24377  | 0.90984 |
| C24 | 1.65119 | -0.0035 | 0.4092  |     |          |          |         |

## 6. TGA of AzoCOFs

Samples were run on a TA Instruments Q-500 series thermal gravimetric analyzer with samples held in a platinum pan under nitrogen atmosphere. A 10 K min<sup>-1</sup> ramp rate was used.

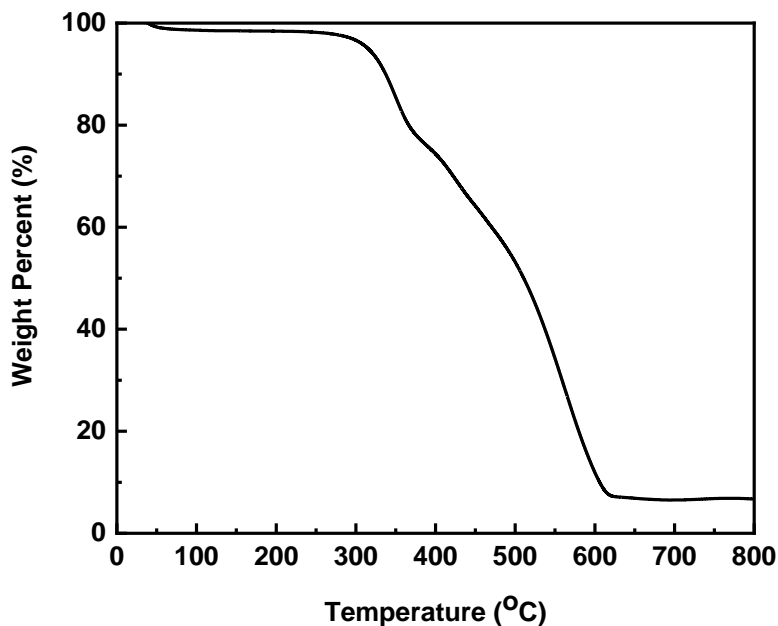

**Figure S9.** TGA of Tg-AzoCOF.

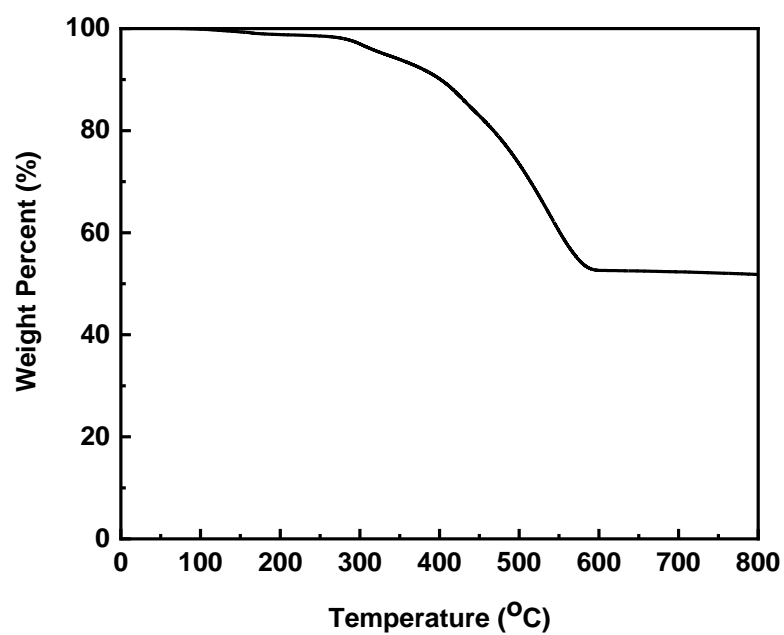

**Figure S10.** TGA of **H-AzoCOF**.

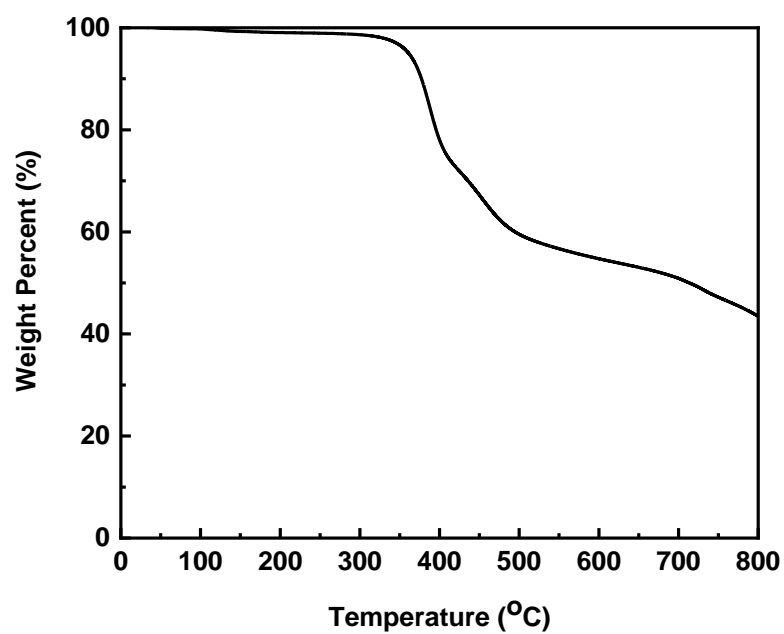

**Figure S11.** TGA of **C<sub>10</sub>-AzoCOF**.

## 7. Additional adsorption data of AzoCOFs

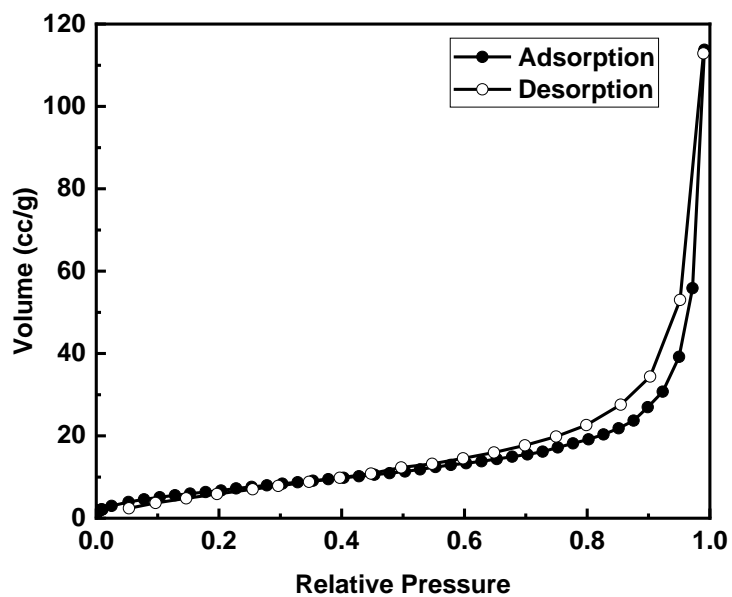

Figure S12. N<sub>2</sub> Adsorption Isotherms of **Tg-AzoCOF** at 77 K.

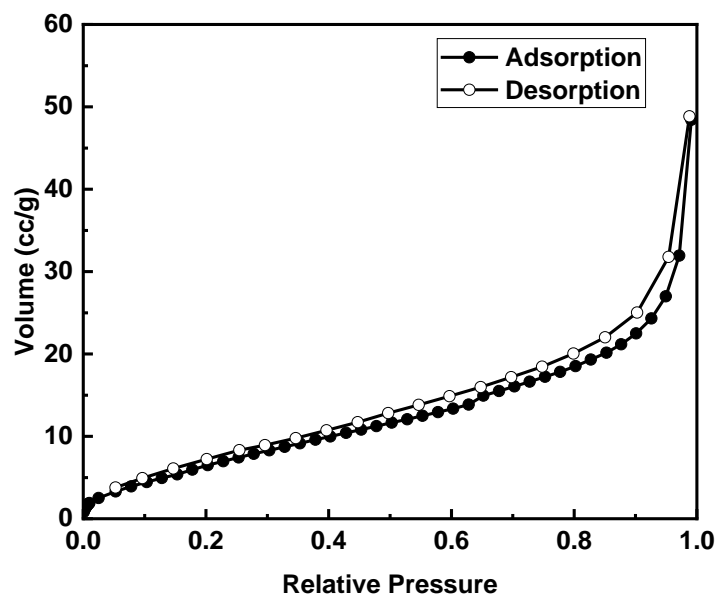

Figure S13. N<sub>2</sub> Adsorption Isotherms of **C<sub>10</sub>-AzoCOF** at 77 K.

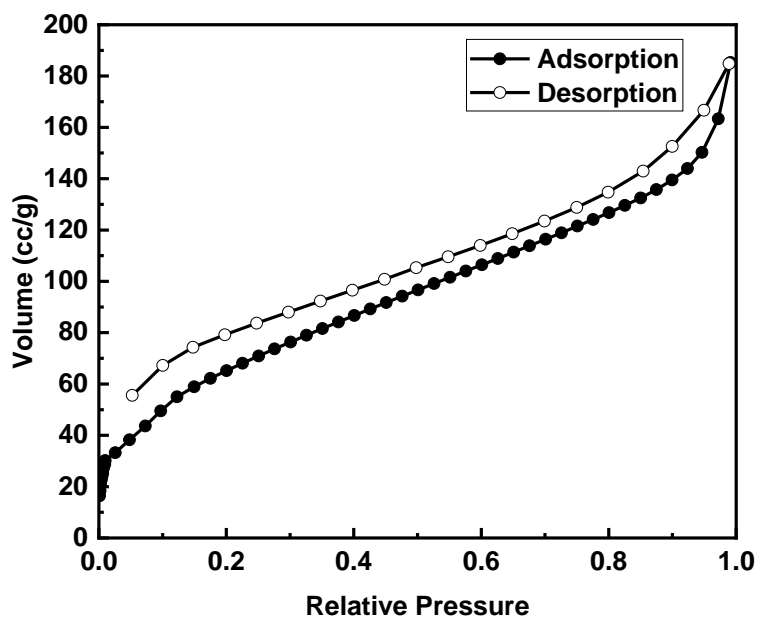

**Figure S14.** N<sub>2</sub> Adsorption Isotherms of **H-AzoCOF** at 77 K.

**Table S4.** Surface Area Calculation Based on the BET Model of N<sub>2</sub> Adsorption.

| COFs            | $S_{\text{BET}}/\text{m}^2 \text{ g}^{-1}$ | Pressure<br>Range $P/P_0$ | Points | C Constant | Correlation<br>Coefficient |
|-----------------|--------------------------------------------|---------------------------|--------|------------|----------------------------|
| <b>H-AzoCOF</b> | 245                                        | 0.05~0.35                 | 11     | 40.911     | 0.999158                   |



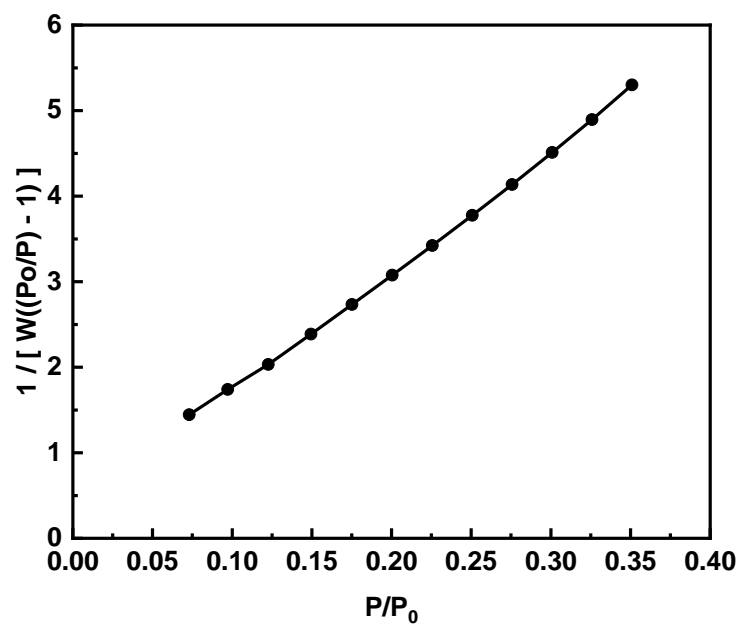

**Figure S15.** BET Surface Area of **H-AzoCOF** Based on  $N_2$  Adsorption Isotherms.

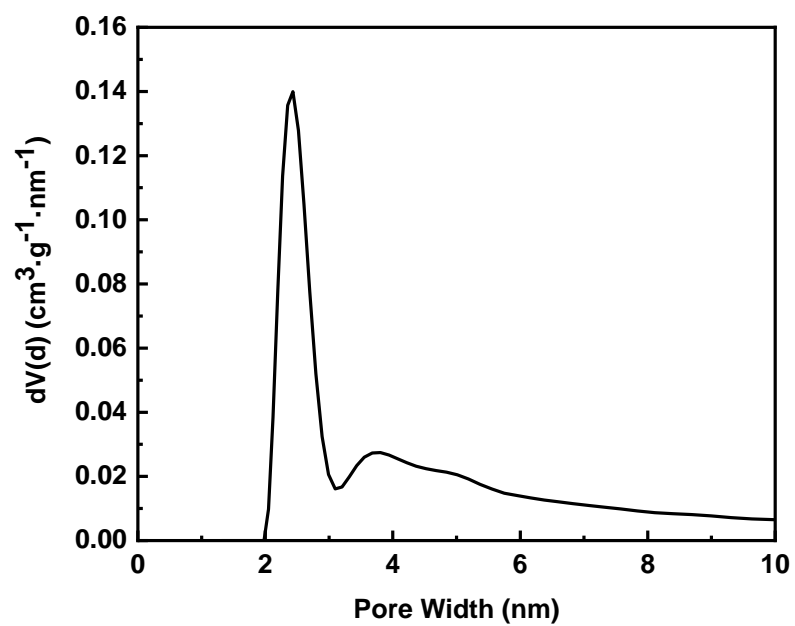

**Figure S16.** Pore Size Distribution of **H-AzoCOF**.

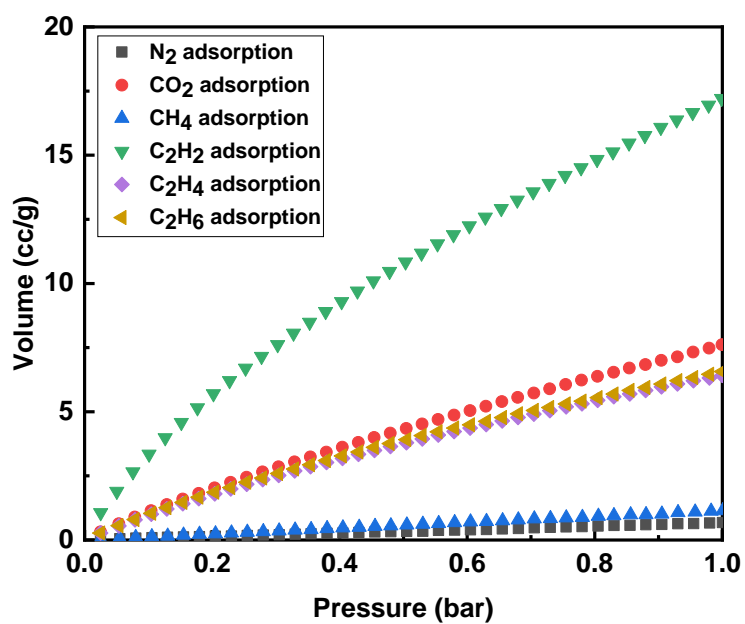

Figure S17. Gas Adsorption Isotherms of **Tg-AzoCOF** at 295 K.

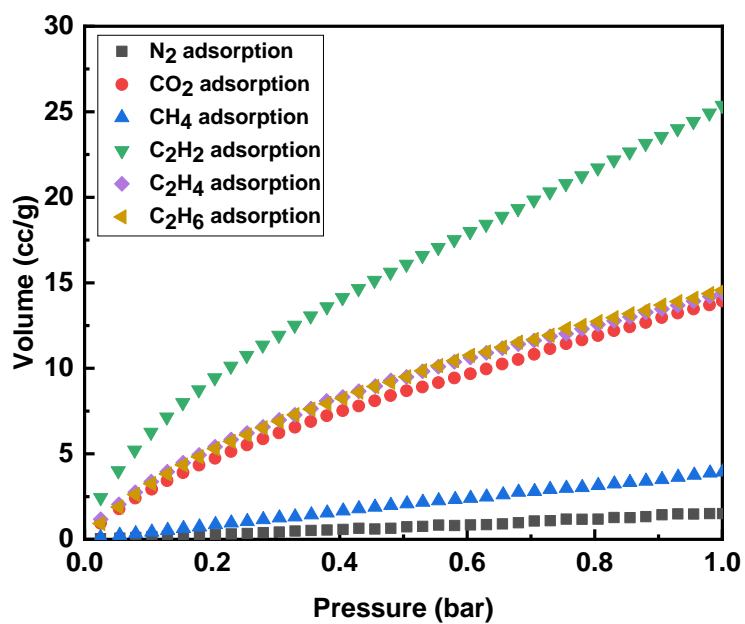

Figure S18. Gas Adsorption Isotherms of **H-AzoCOF** at 295 K.

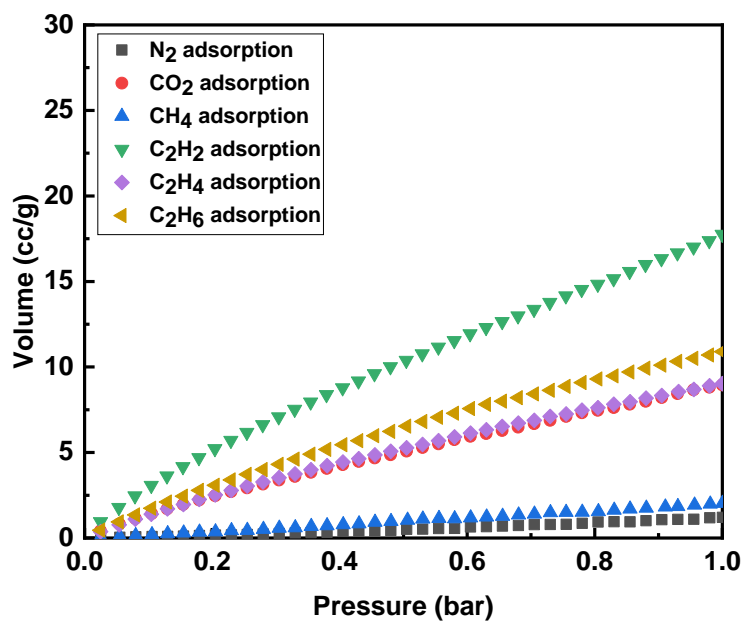

Figure S19. Gas Adsorption Isotherms of  $C_{10}$ -AzoCOF at 295 K.

## 8. Additional IAST calculation results of AzoCOFs

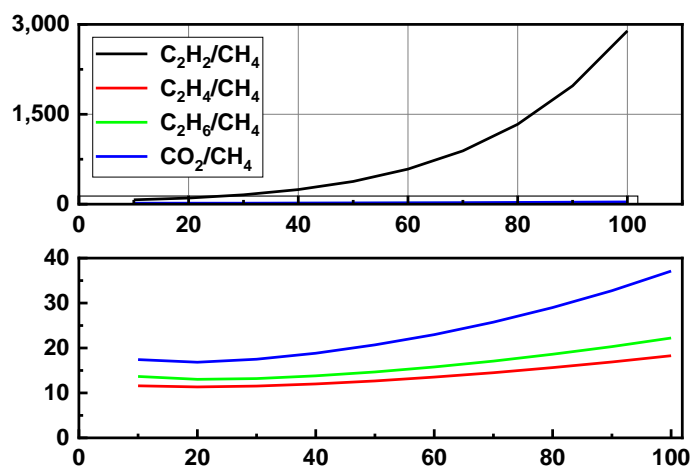

Figure S20. Gas adsorption selectivity with 50:50 ratio gas mixture of **Tg-AzoCOF** at 273 K predicted by IAST.

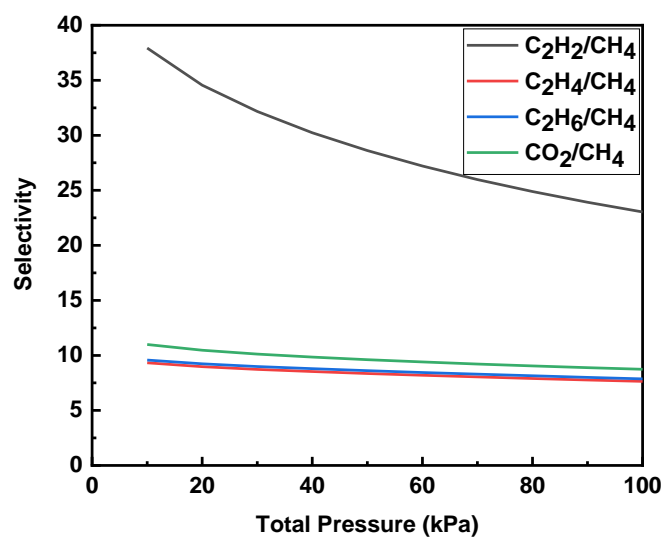

**Figure S21.** Gas adsorption selectivity with 50:50 ratio gas mixture of **Tg-AzoCOF** at 295 K predicted by IAST.

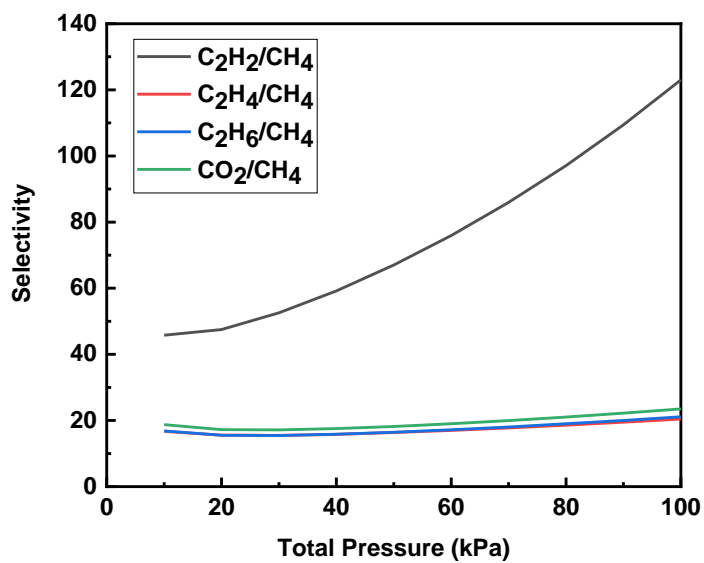

**Figure S22.** Gas adsorption selectivity with 50:50 ratio gas mixture of **H-AzoCOF** at 273 K predicted by IAST.

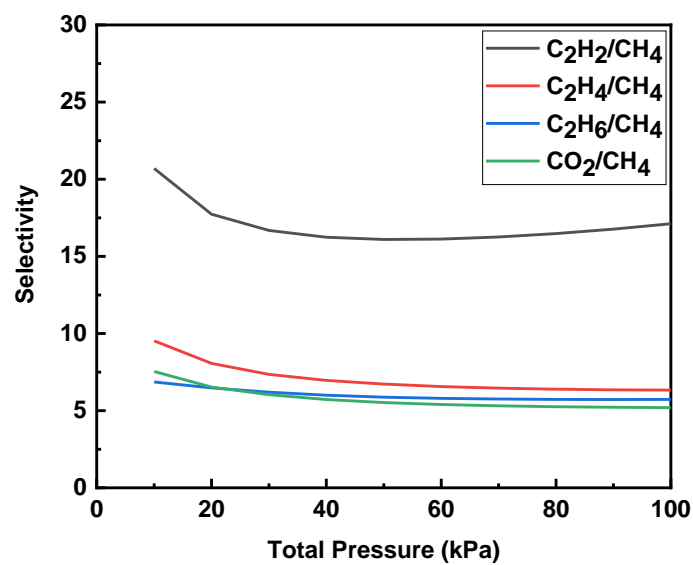

**Figure S23.** Gas adsorption selectivity with 50:50 ratio gas mixture of **H-AzoCOF** at 295 K predicted by IAST.

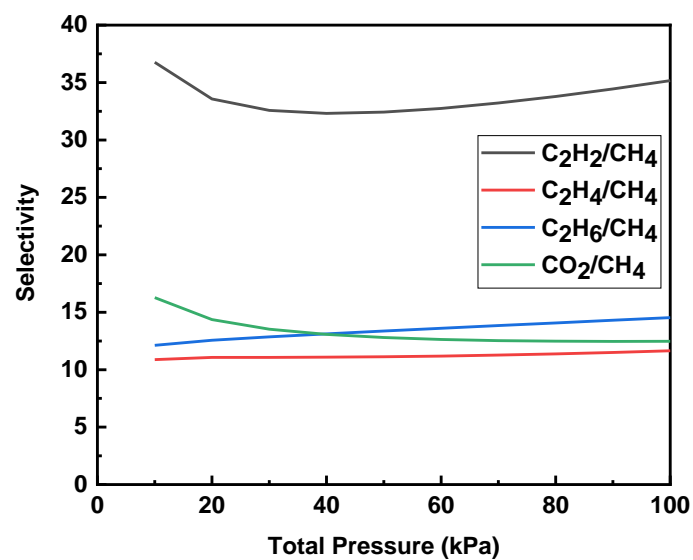

**Figure S24.** Gas adsorption selectivity with 50:50 ratio gas mixture of **C<sub>10</sub>-AzoCOF** at 273 K predicted by IAST.

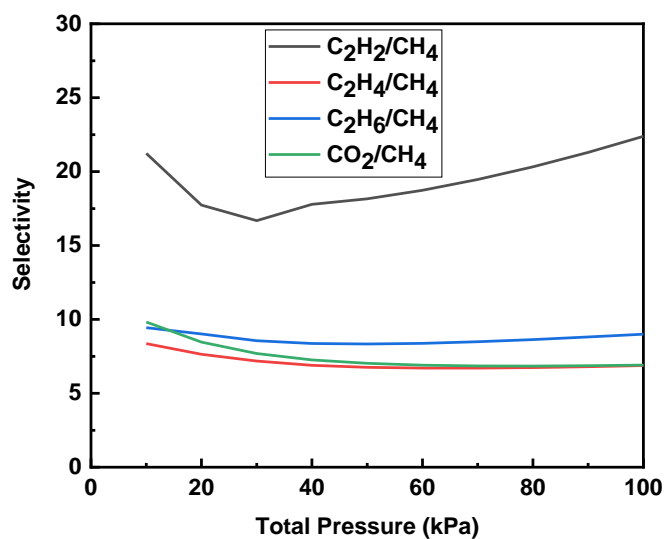

**Figure S25.** Gas adsorption selectivity with 50:50 ratio gas mixture of  $C_{10}$ -AzoCOF at 295 K predicted by IAST.

## 9. Estimation of adsorption heat of AzoCOFs

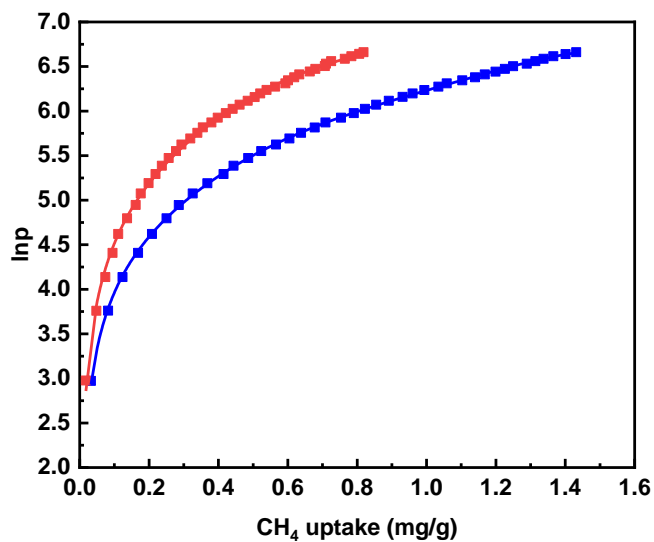

**Figure S26.** Virial Analysis of  $CH_4$  Adsorption Isotherms of Tg-AzoCOF at 273 K (blue) and 295 K (red).

**Table S5.** Virial Equation Fitting Results of CH<sub>4</sub> Adsorption of **Tg-AzoCOF**.

| $a_0$    | $a_1$   | $a_2$   | $a_3$    | $a_4$   | $a_5$    | $b_0$    | $b_1$   | $b_2$    | $R^2$   |
|----------|---------|---------|----------|---------|----------|----------|---------|----------|---------|
| -1785.85 | -2692.5 | 3735.34 | -2562.37 | 1682.47 | -412.504 | 12.95887 | 7.76923 | -7.04061 | 0.99998 |

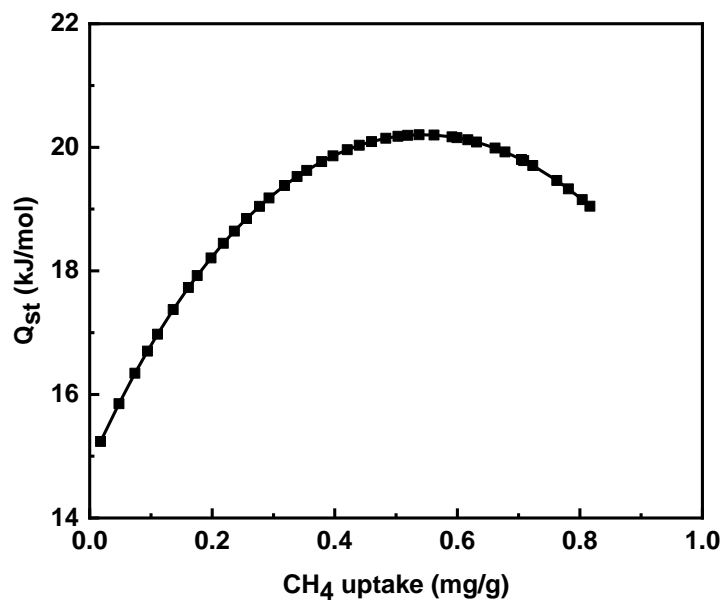

**Figure S27.** Isosteric Heat of CH<sub>4</sub> Adsorption of **Tg-AzoCOF**.

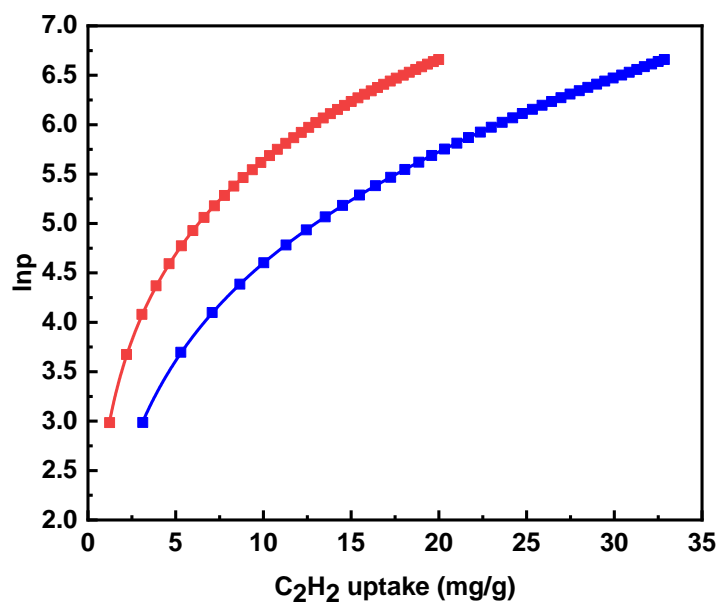

**Figure S28.** Virial Analysis of  $C_2H_2$  Adsorption Isotherms of **Tg-AzoCOF** at 273 K (blue) and 295 K (red).

**Table S6.** Virial Equation Fitting Results of  $C_2H_2$  Adsorption of **Tg-AzoCOF**.

| $a_0$   | $a_1$    | $a_2$    | $a_3$   | $a_4$    | $a_5$    | $b_0$    | $b_1$   | $b_2$    | $R^2$   |
|---------|----------|----------|---------|----------|----------|----------|---------|----------|---------|
| -4090.4 | 30.25817 | -0.90116 | 0.08409 | -0.00204 | 1.97E-05 | 16.52674 | 0.00728 | -0.00338 | 0.99999 |



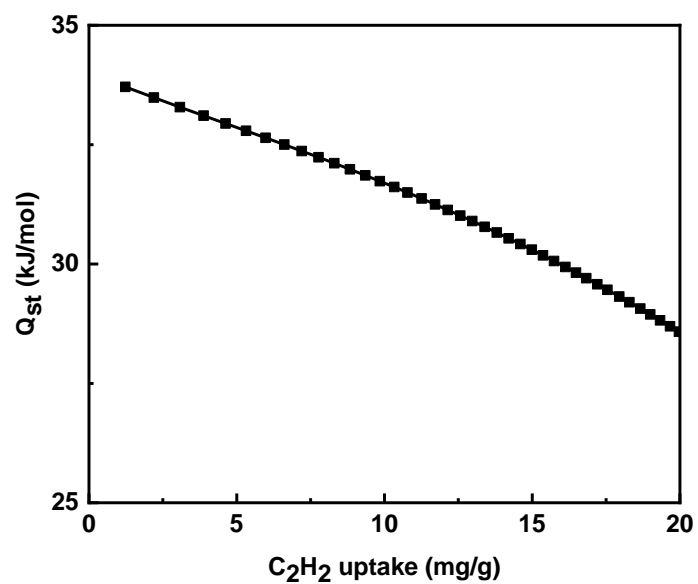

**Figure S29.** Isosteric Heat of C<sub>2</sub>H<sub>2</sub> Adsorption of **Tg-AzoCOF**.

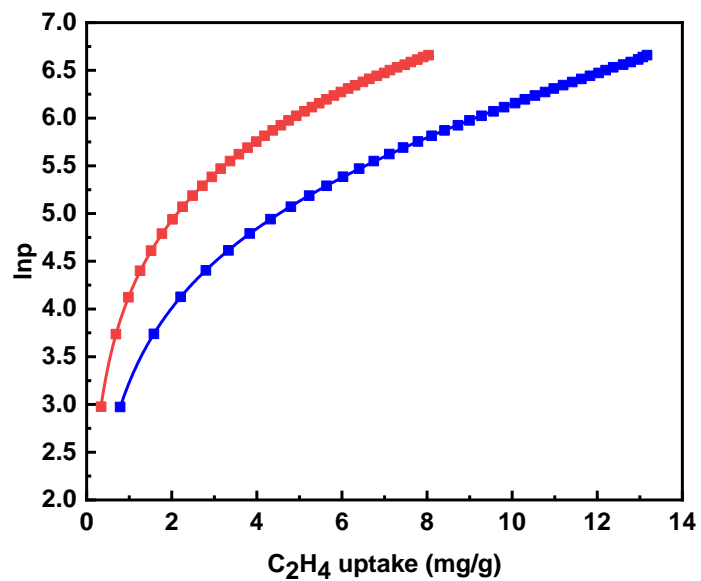

**Figure S30.** Virial Analysis of C<sub>2</sub>H<sub>4</sub> Adsorption Isotherms of **Tg-AzoCOF** at 273 K (blue) and 295 K (red).

**Table S7.** Virial Equation Fitting Results of C<sub>2</sub>H<sub>4</sub> Adsorption of **Tg-AzoCOF**.

| $a_0$    | $a_1$    | $a_2$   | $a_3$ | $a_4$    | $a_5$   | $b_0$    | $b_1$   | $b_2$   | $R^2$   |
|----------|----------|---------|-------|----------|---------|----------|---------|---------|---------|
| -3295.76 | -44.0586 | 4.18532 | 0.853 | -0.06064 | 0.00166 | 15.18816 | 0.29293 | -0.0363 | 0.99999 |

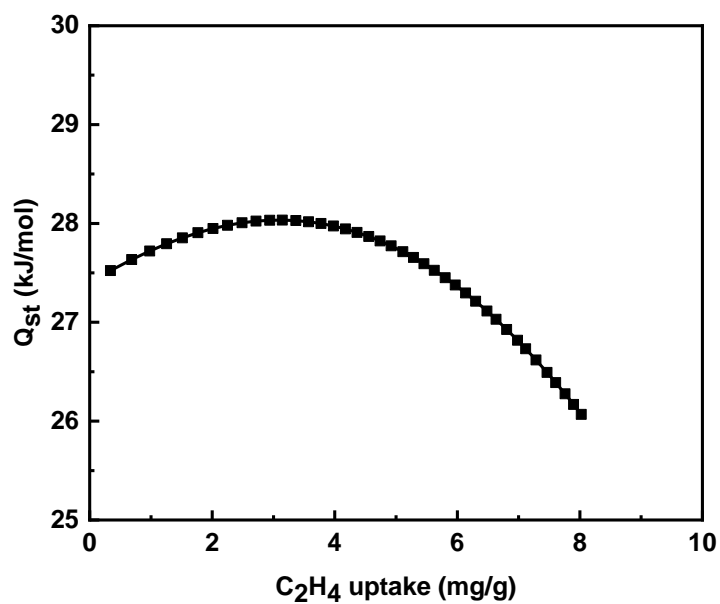

**Figure S31.** Isosteric Heat of C<sub>2</sub>H<sub>4</sub> Adsorption of **Tg-AzoCOF**.

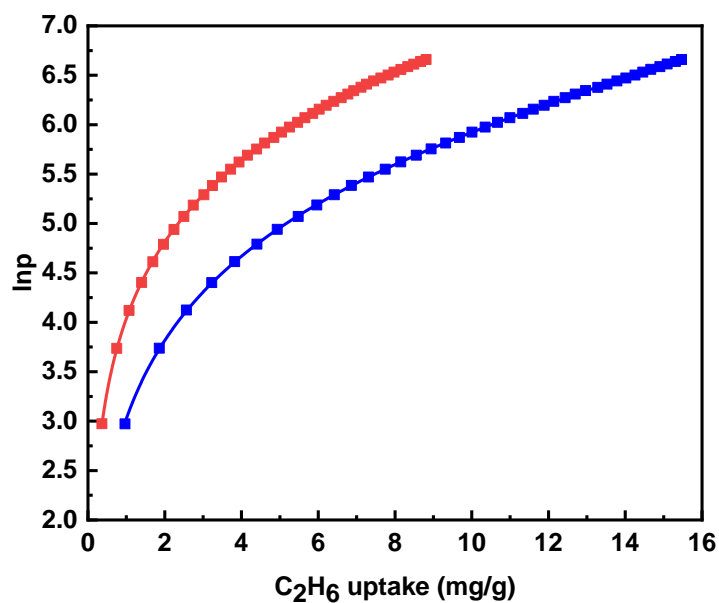

**Figure S32.** Virial Analysis of C<sub>2</sub>H<sub>6</sub> Adsorption Isotherms of **Tg-AzoCOF** at 273 K (blue) and 295 K (red).

**Table S8.** Virial Equation Fitting Results of C<sub>2</sub>H<sub>6</sub> Adsorption of **Tg-AzoCOF**.

| $a_0$    | $a_1$   | $a_2$   | $a_3$   | $a_4$    | $a_5$    | $b_0$    | $b_1$    | $b_2$   | $R^2$   |
|----------|---------|---------|---------|----------|----------|----------|----------|---------|---------|
| -3781.23 | 76.4081 | -5.1039 | 0.16264 | -0.00378 | 1.77E-05 | 16.76064 | -0.15573 | 0.00874 | 0.99997 |

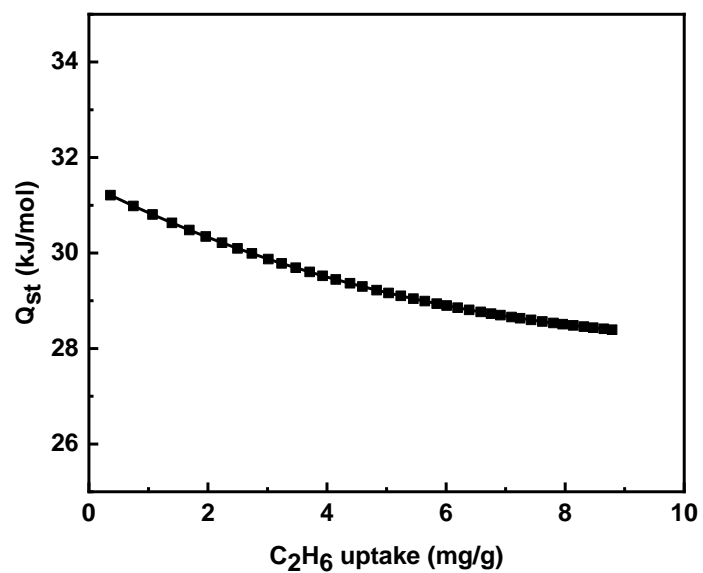

**Figure S33.** Isosteric Heat of C<sub>2</sub>H<sub>6</sub> Adsorption of **Tg-AzoCOF**.

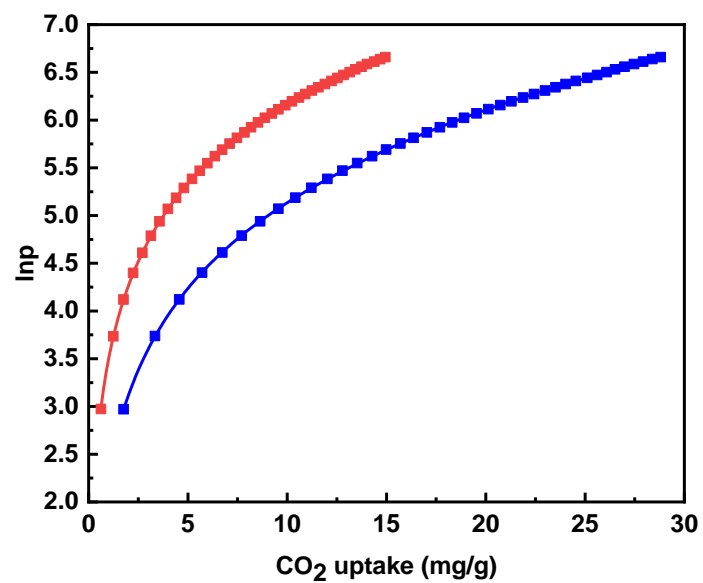

**Figure S34.** Virial Analysis of CO<sub>2</sub> Adsorption Isotherms of **Tg-AzoCOF** at 273 K (blue) and 295 K (red).

**Table S9.** Virial Equation Fitting Results of CO<sub>2</sub> Adsorption of **Tg-AzoCOF**.

| $A_0$    | $a_1$    | $a_2$    | $a_3$   | $a_4$    | $a_5$    | $b_0$    | $b_1$    | $b_2$   | $R^2$   |
|----------|----------|----------|---------|----------|----------|----------|----------|---------|---------|
| -4343.55 | 78.49639 | -3.54269 | 0.18037 | -0.00539 | 6.28E-05 | 18.12236 | -0.16286 | 0.00184 | 0.99998 |

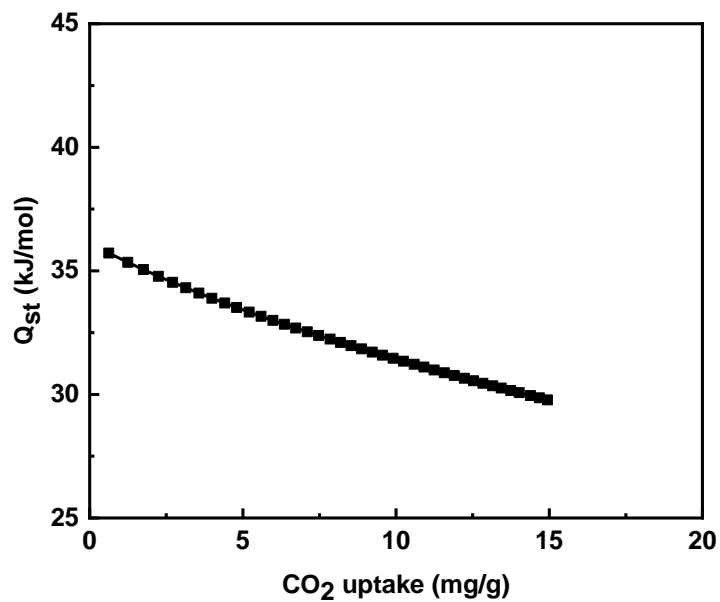

**Figure S35.** Isosteric Heat of CO<sub>2</sub> Adsorption of **Tg-AzoCOF**.

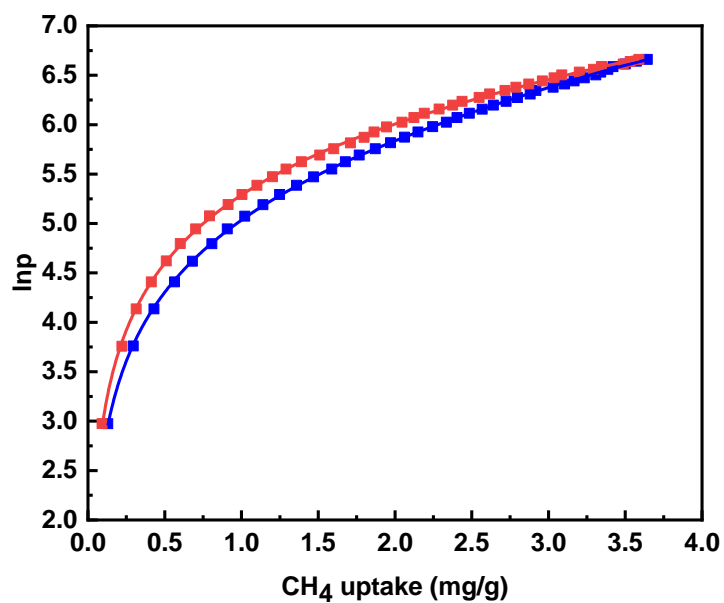

**Figure S36.** Virial Analysis of CH<sub>4</sub> Adsorption Isotherms of **H-AzoCOF** at 273 K (blue) and 295 K (red).

**Table S10.** Virial Equation Fitting Results of CH<sub>4</sub> Adsorption of **H-AzoCOF**.

| $A_0$    | $a_1$    | $a_2$    | $a_3$   | $a_4$   | $a_5$    | $b_0$   | $b_1$   | $b_2$    | $R^2$   |
|----------|----------|----------|---------|---------|----------|---------|---------|----------|---------|
| -1200.17 | 223.4831 | 77.06909 | -38.113 | 9.96402 | -0.98271 | 9.41048 | -0.9536 | -0.02059 | 0.99979 |

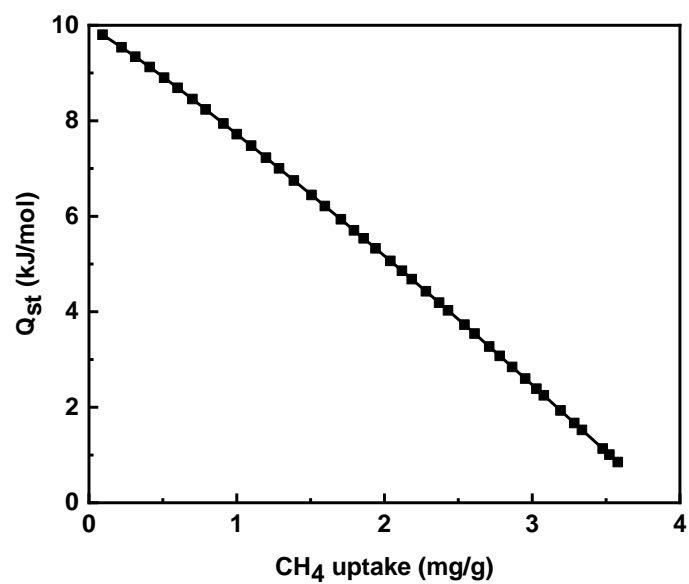

**Figure S37.** Isosteric Heat of CH<sub>4</sub> Adsorption of **H-AzoCOF**.

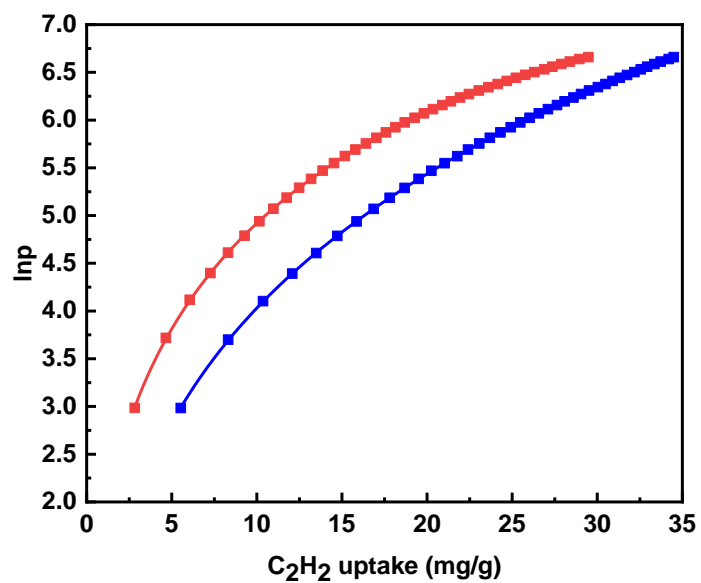

**Figure S38.** Virial Analysis of C<sub>2</sub>H<sub>2</sub> Adsorption Isotherms of **H-AzoCOF** at 273 K (blue) and 295 K (red).

**Table S11.** Virial Equation Fitting Results of C<sub>2</sub>H<sub>2</sub> Adsorption of **H-AzoCOF**.

| $A_0$    | $a_1$    | $a_2$    | $a_3$   | $a_4$    | $a_5$    | $b_0$    | $b_1$    | $b_2$    | $R^2$   |
|----------|----------|----------|---------|----------|----------|----------|----------|----------|---------|
| -3981.48 | 75.04342 | -1.06492 | 0.10719 | -0.00242 | 2.18E-05 | 15.02509 | -0.08081 | -0.00575 | 0.99979 |

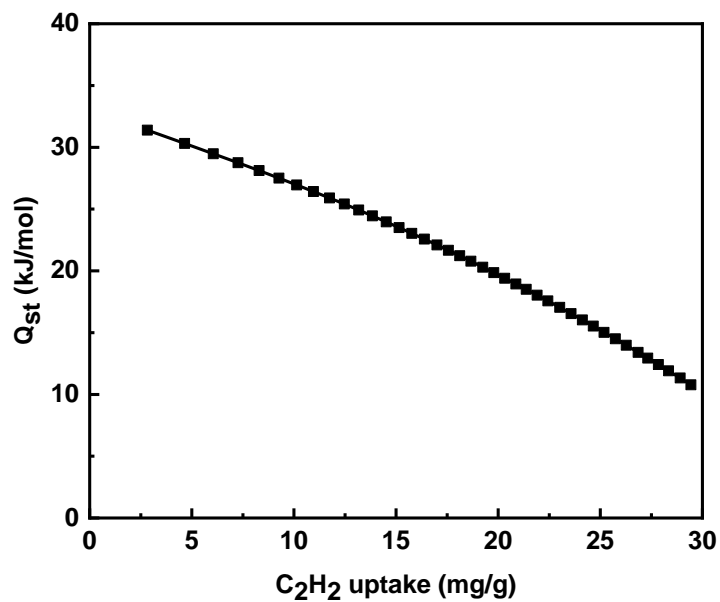

**Figure S39.** Isosteric Heat of C<sub>2</sub>H<sub>2</sub> Adsorption of **H-AzoCOF**.



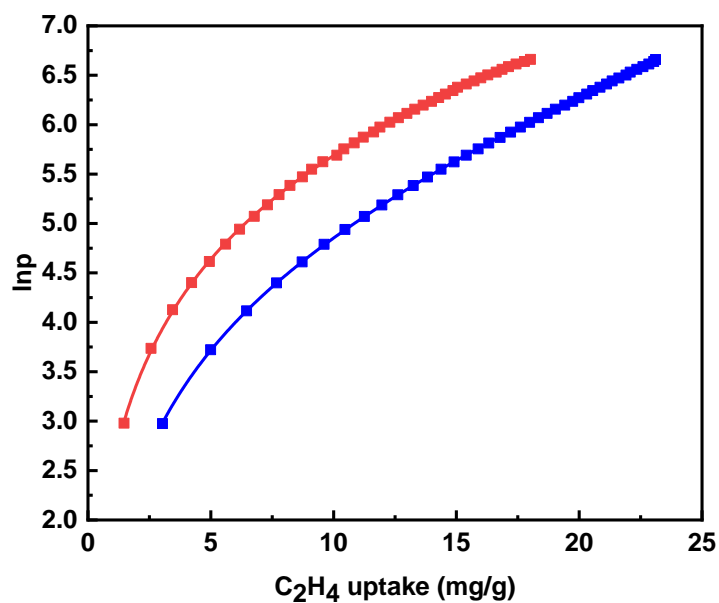

**Figure S40.** Virial Analysis of  $\text{C}_2\text{H}_4$  Adsorption Isotherms of **H-AzoCOF** at 273 K (blue) and 295 K (red).

**Table S12.** Virial Equation Fitting Results of  $\text{C}_2\text{H}_4$  Adsorption of **H-AzoCOF**.

| $A_0$    | $a_1$    | $a_2$    | $a_3$   | $a_4$   | $a_5$    | $b_0$    | $b_1$    | $b_2$    | $R^2$   |
|----------|----------|----------|---------|---------|----------|----------|----------|----------|---------|
| -3682.31 | 70.63471 | -3.63363 | 0.42053 | -0.0157 | 2.32E-04 | 14.82781 | -0.03167 | -0.00779 | 0.99979 |

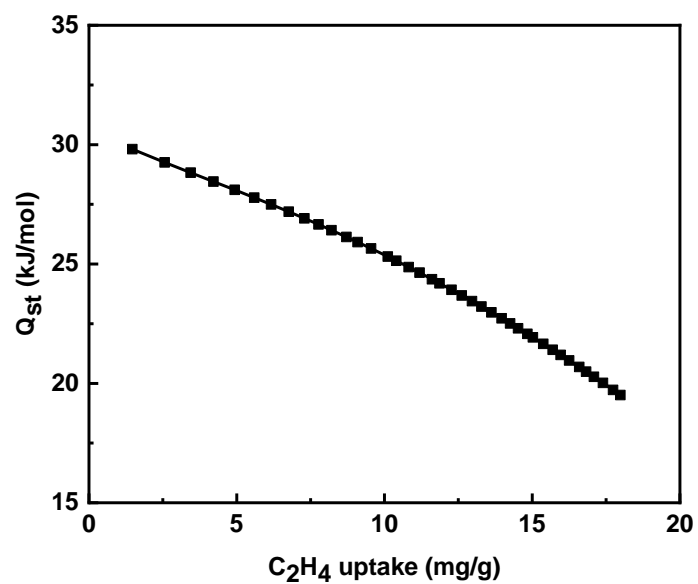

**Figure S41.** Isosteric Heat of C<sub>2</sub>H<sub>4</sub> Adsorption of **H-AzoCOF**.

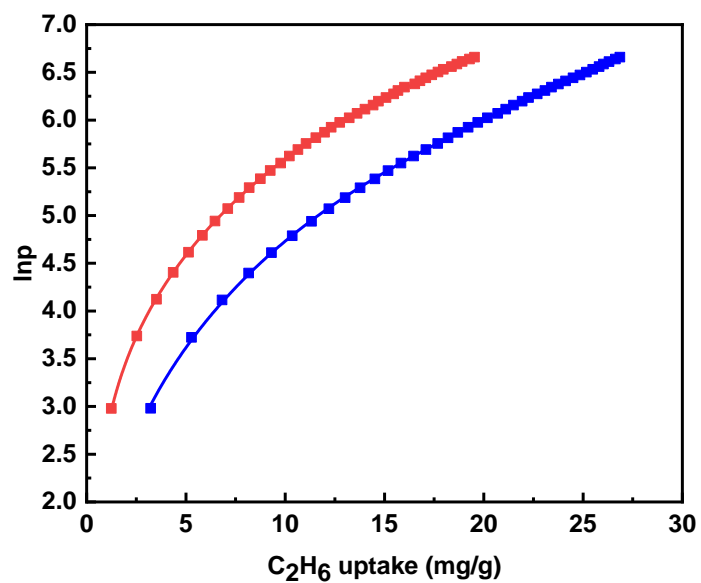

**Figure S42.** Virial Analysis of C<sub>2</sub>H<sub>6</sub> Adsorption Isotherms of **H-AzoCOF** at 273 K (blue) and 295 K (red).

**Table S13.** Virial Equation Fitting Results of C<sub>2</sub>H<sub>6</sub> Adsorption of **H-AzoCOF**.

| $A_0$    | $a_1$    | $a_2$   | $a_3$    | $a_4$   | $a_5$     | $b_0$    | $b_1$   | $b_2$   | $R^2$   |
|----------|----------|---------|----------|---------|-----------|----------|---------|---------|---------|
| -4003.98 | 90.43744 | 1.21452 | -0.25482 | 0.00968 | -1.28E-04 | 16.26465 | -0.2752 | 0.00451 | 0.99979 |

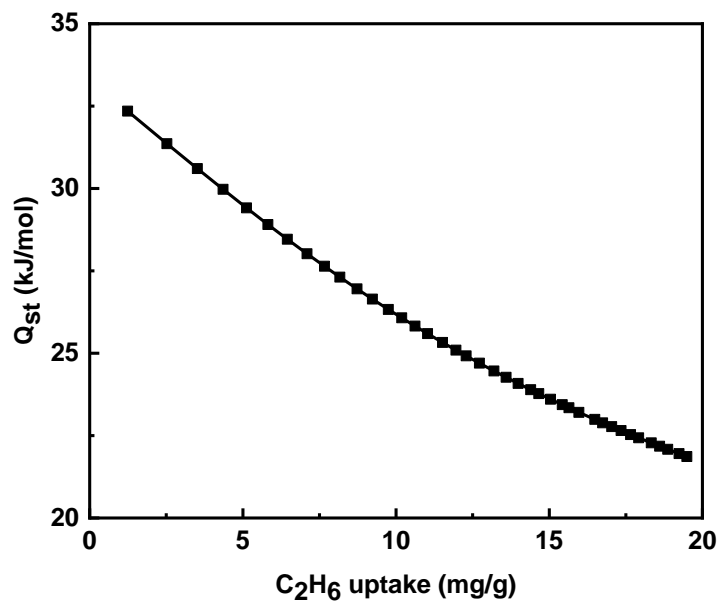

**Figure S43.** Isosteric Heat of C<sub>2</sub>H<sub>6</sub> Adsorption of **H-AzoCOF**.

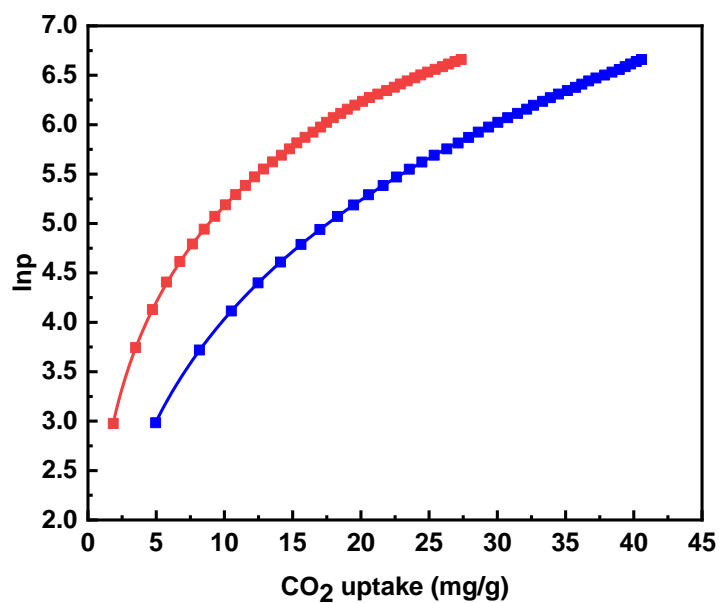

**Figure S44.** Virial Analysis of  $\text{CO}_2$  Adsorption Isotherms of **H-AzoCOF** at 273 K (blue) and 295 K (red).

**Table S14.** Virial Equation Fitting Results of  $\text{CO}_2$  Adsorption of **H-AzoCOF**.

| $A_0$    | $a_1$    | $a_2$   | $a_3$   | $a_4$     | $a_5$    | $b_0$    | $b_1$    | $b_2$   | $R^2$   |
|----------|----------|---------|---------|-----------|----------|----------|----------|---------|---------|
| -4597.15 | 34.03239 | 0.50867 | 0.02131 | -3.64E-04 | 2.82E-06 | 17.78586 | -0.02337 | -0.0048 | 0.99979 |

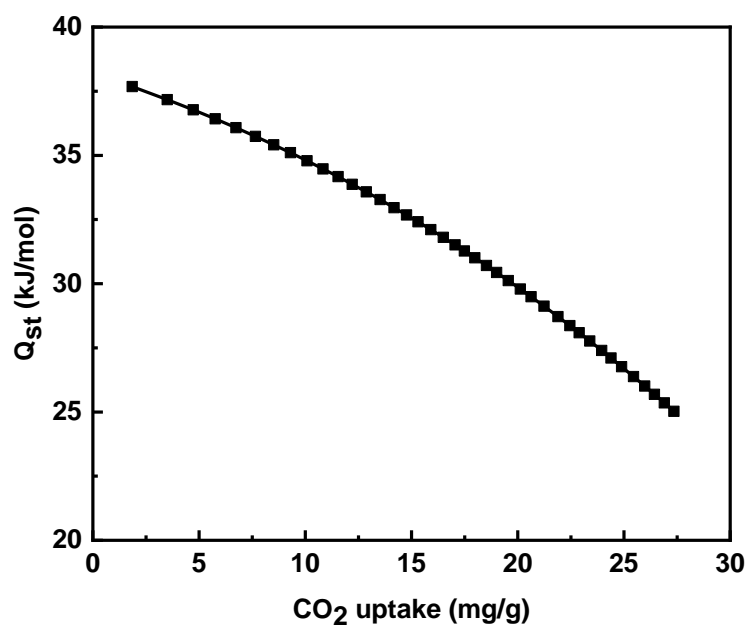

**Figure S45.** Isosteric Heat of CO<sub>2</sub> Adsorption of **H-AzoCOF**.

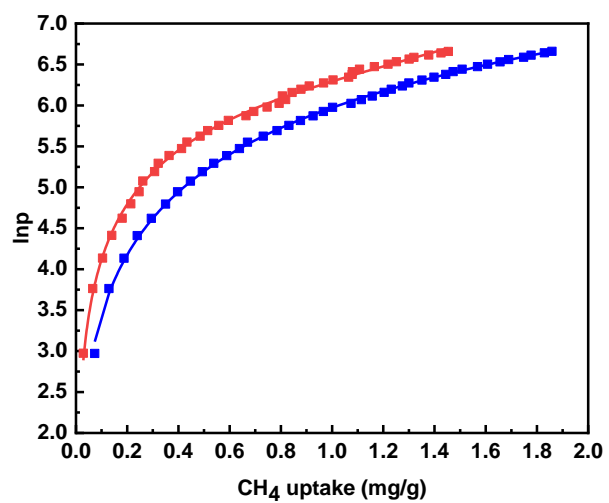

**Figure S46.** Virial Analysis of CH<sub>4</sub> Adsorption Isotherms of **C<sub>10</sub>-AzoCOF** at 273 K (blue) and 295 K (red).

**Table S15.** Virial Equation Fitting Results of CH<sub>4</sub> Adsorption of C<sub>10</sub>-AzoCOF.

| $a_0$    | $a_1$    | $a_2$    | $a_3$   | $a_4$    | $a_5$     | $b_0$    | $b_1$    | $b_2$   | $R^2$   |
|----------|----------|----------|---------|----------|-----------|----------|----------|---------|---------|
| -2750.13 | 2647.475 | -1069.89 | -34.928 | 42.68766 | -10.50461 | 15.76139 | -9.16099 | 3.67685 | 0.99845 |

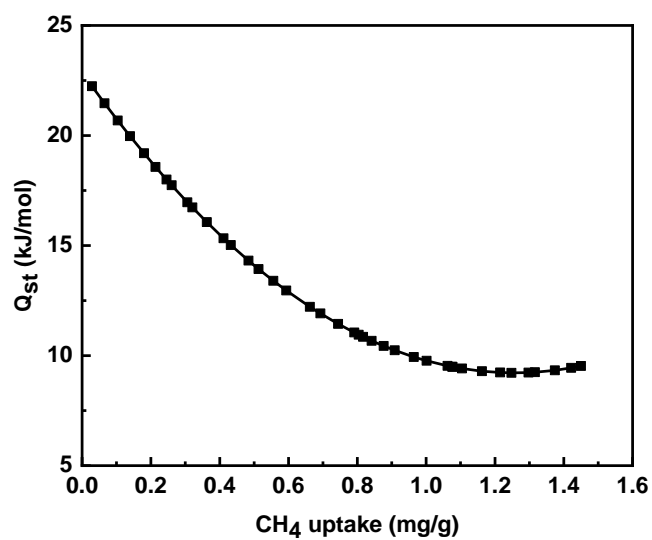

**Figure S47.** Isosteric Heat of CH<sub>4</sub> Adsorption of C<sub>10</sub>-AzoCOF.

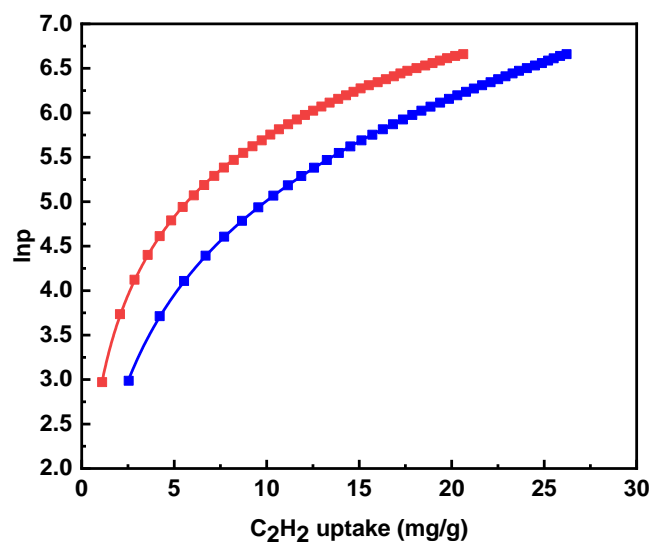

**Figure S48.** Virial Analysis of C<sub>2</sub>H<sub>2</sub> Adsorption Isotherms of C<sub>10</sub>-AzoCOF at 273 K (blue) and 295 K (red).

**Table S16.** Virial Equation Fitting Results of C<sub>2</sub>H<sub>2</sub> Adsorption of C<sub>10</sub>-AzoCOF.

| $a_0$    | $a_1$    | $a_2$   | $a_3$   | $a_4$    | $a_5$       | $b_0$    | $b_1$    | $b_2$   | $R^2$   |
|----------|----------|---------|---------|----------|-------------|----------|----------|---------|---------|
| -3926.04 | 164.0068 | -5.4334 | 0.27212 | -0.00865 | 0.000109508 | 16.03335 | -0.40062 | 0.00323 | 0.99996 |

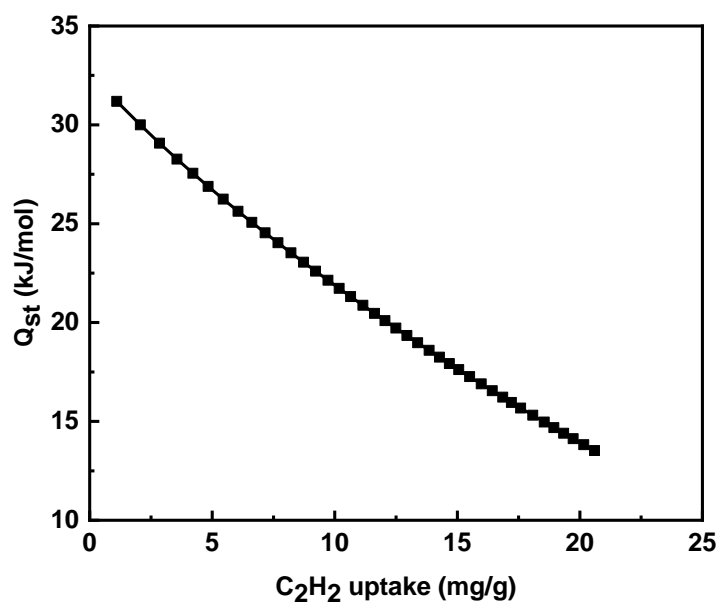

**Figure S49.** Isosteric Heat of C<sub>2</sub>H<sub>2</sub> Adsorption of C<sub>10</sub>-AzoCOF.

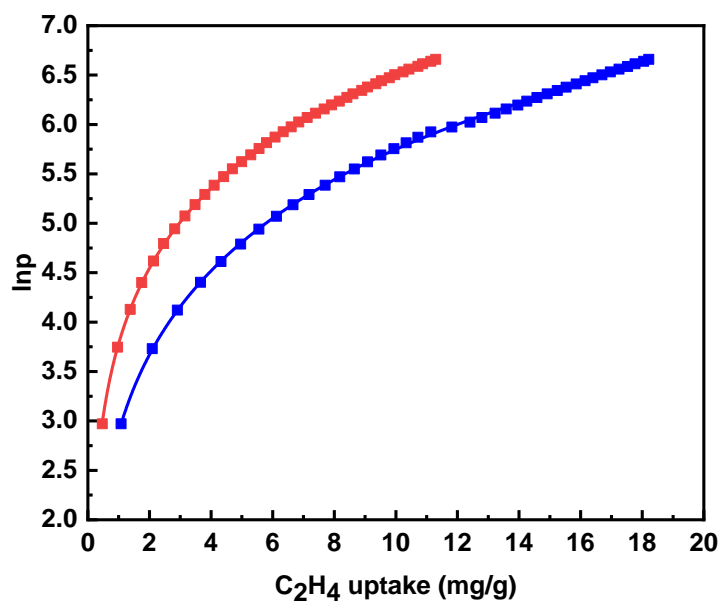

**Figure S50.** Virial Analysis of C<sub>2</sub>H<sub>4</sub> Adsorption Isotherms of C<sub>10</sub>-AzoCOF at 273 K (blue) and 295 K (red).



**Table S17.** Virial Equation Fitting Results of C<sub>2</sub>H<sub>4</sub> Adsorption of C<sub>10</sub>-AzoCOF.

| $a_0$    | $a_1$    | $a_2$    | $a_3$   | $a_4$    | $a_5$       | $b_0$    | $b_1$    | $b_2$   | $R^2$   |
|----------|----------|----------|---------|----------|-------------|----------|----------|---------|---------|
| -3376.79 | 92.52776 | -3.91326 | 0.15639 | -0.00925 | 0.000243518 | 15.14954 | -0.22724 | 0.00659 | 0.99989 |

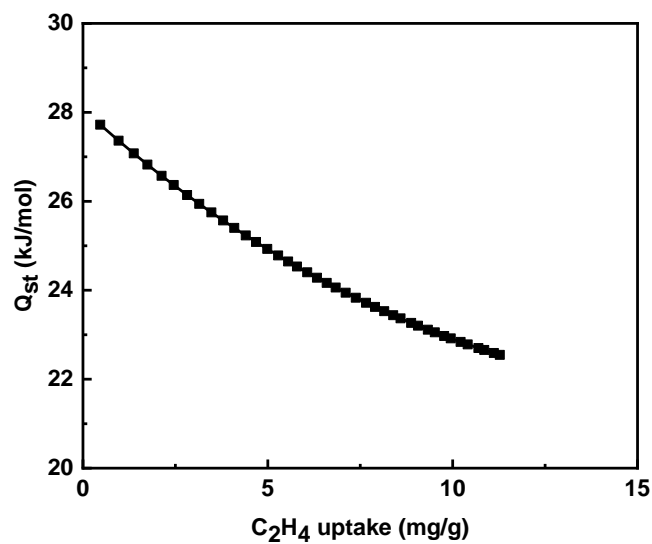

**Figure S51.** Isosteric Heat of C<sub>2</sub>H<sub>4</sub> Adsorption of C<sub>10</sub>-AzoCOF.

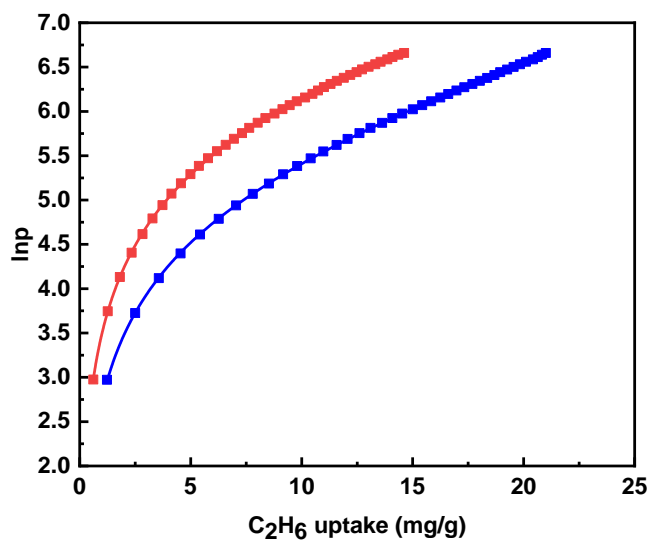

**Figure S52.** Virial Analysis of C<sub>2</sub>H<sub>6</sub> Adsorption Isotherms of C<sub>10</sub>-AzoCOF at 273 K (blue) and 295 K (red).

**Table S18.** Virial Equation Fitting Results of C<sub>2</sub>H<sub>6</sub> Adsorption of C<sub>10</sub>-AzoCOF.

| $a_0$    | $a_1$    | $a_2$   | $a_3$   | $a_4$    | $a_5$       | $b_0$    | $b_1$   | $b_2$    | $R^2$   |
|----------|----------|---------|---------|----------|-------------|----------|---------|----------|---------|
| -2731.76 | -29.1441 | 2.00237 | 0.17474 | -0.00825 | 0.000147568 | 12.68565 | 0.17075 | -0.01338 | 0.99995 |

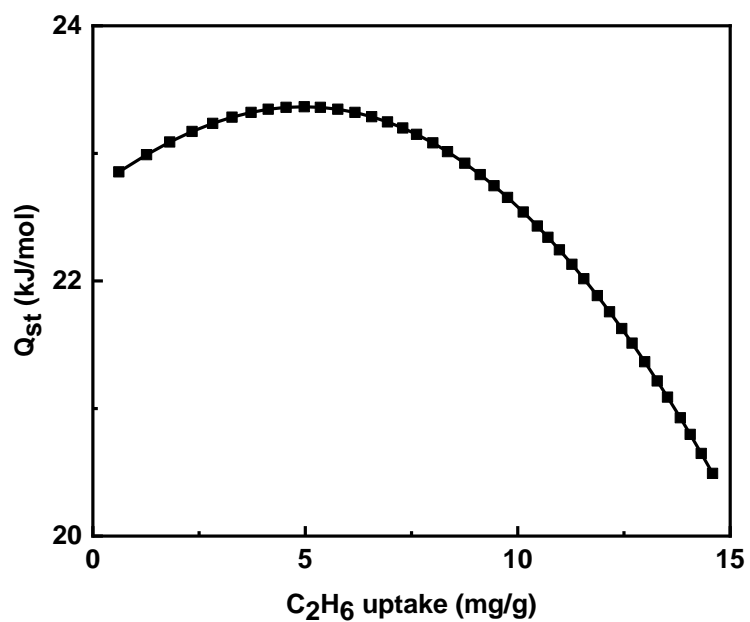

**Figure S53.** Isosteric Heat of C<sub>2</sub>H<sub>6</sub> Adsorption of C<sub>10</sub>-AzoCOF.

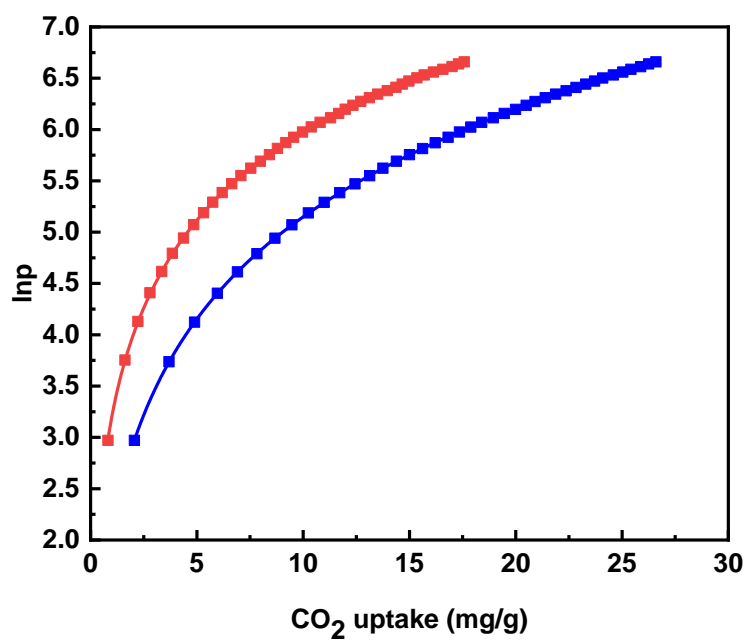

**Figure S54.** Virial Analysis of CO<sub>2</sub> Adsorption Isotherms of **C<sub>10</sub>-AzoCOF** at 273 K (blue) and 295 K (red).

**Table S19.** Virial Equation Fitting Results of CO<sub>2</sub> Adsorption of **C<sub>10</sub>-AzoCOF**.

| $a_0$    | $a_1$    | $a_2$    | $a_3$   | $a_4$    | $a_5$    | $b_0$    | $b_1$    | $b_2$   | $R^2$   |
|----------|----------|----------|---------|----------|----------|----------|----------|---------|---------|
| -4159.98 | 147.5614 | -4.88077 | 0.19312 | -0.00531 | 5.87E-05 | 17.18331 | -0.36841 | 0.00433 | 0.99997 |

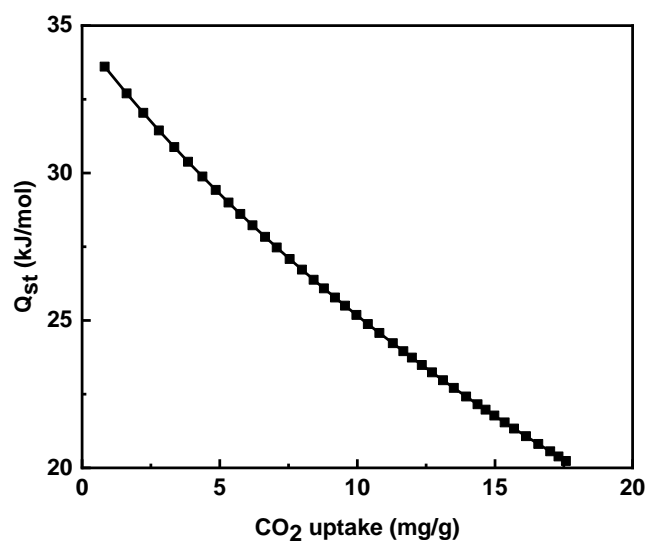

**Figure S55.** Isosteric Heat of CO<sub>2</sub> Adsorption of **C<sub>10</sub>-AzoCOF**.

## 10. Gas adsorption properties of H-COF

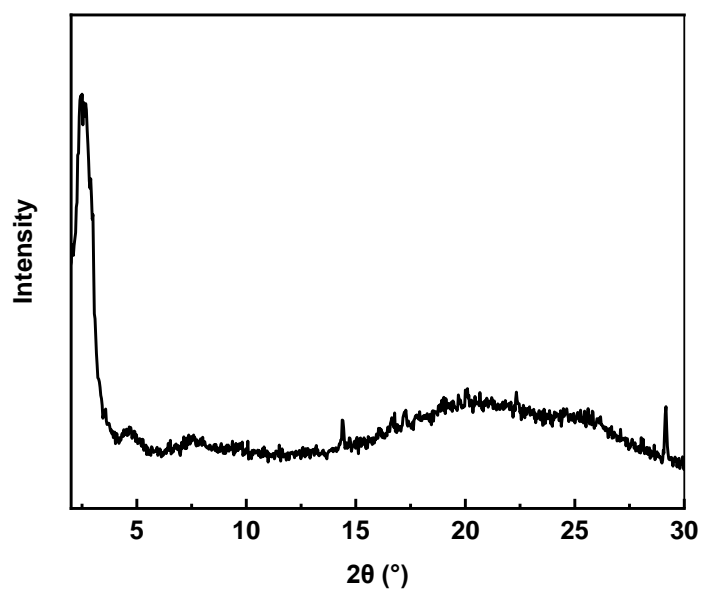

**Figure S56.** PXRD patterns of **H-COF**.

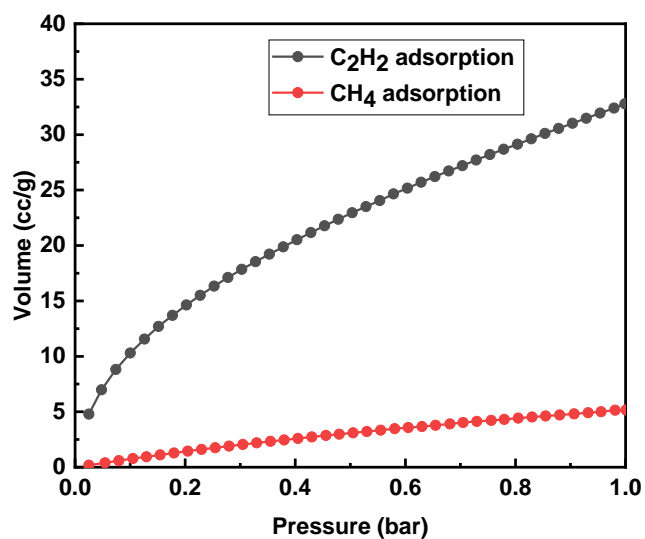

Figure S57.  $\text{C}_2\text{H}_2$  and  $\text{CH}_4$  adsorption isotherms of  $\text{H-COF}$  at 273 K.

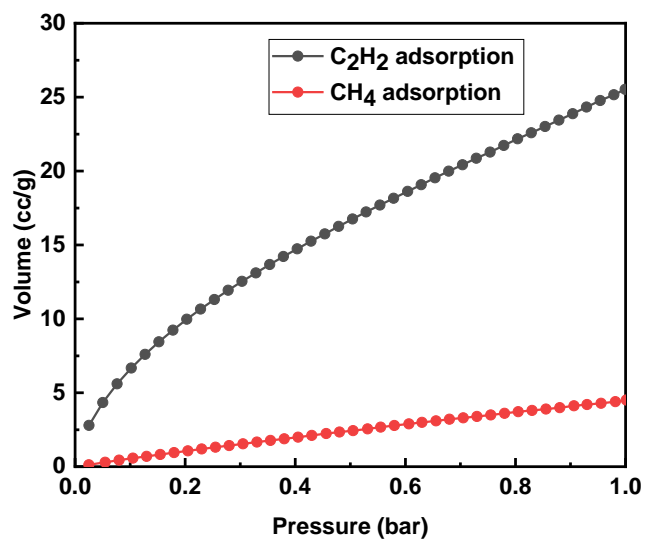

Figure S58.  $\text{C}_2\text{H}_2$  and  $\text{CH}_4$  adsorption isotherms of  $\text{H-COF}$  at 295 K.

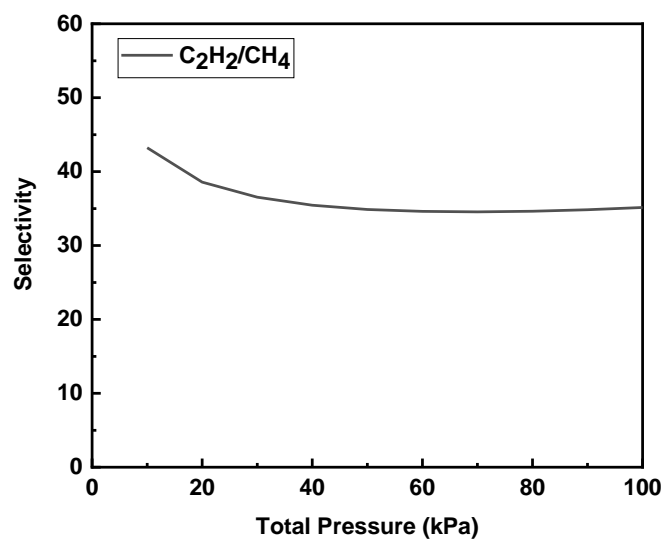

**Figure S59.** IAST selectivity with 50:50 ratio of  $\text{C}_2\text{H}_2/\text{CH}_4$  gas mixture of **H-COF** at 273 K.

## 11. Estimation of adsorption heat of H-COF

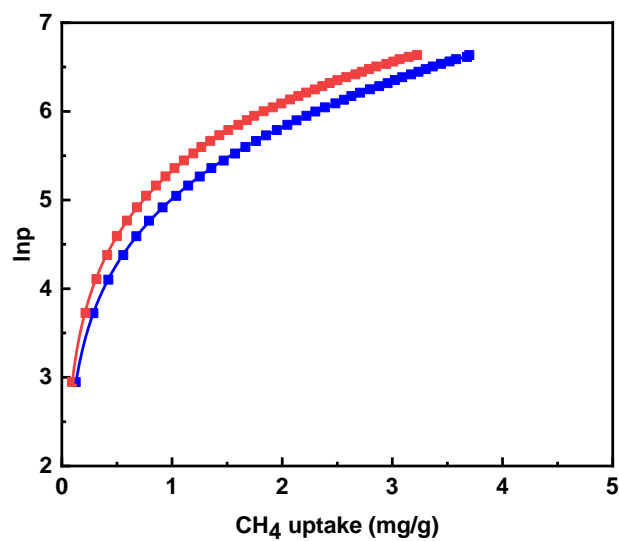

**Figure S60.** Virial Analysis of  $\text{CH}_4$  Adsorption Isotherms of **H-COF** at 273 K (blue) and 295 K (red).

**Table S20.** Virial Equation Fitting Results of CH<sub>4</sub> Adsorption of **H-COF**.

| $a_0$    | $a_1$    | $a_2$   | $a_3$    | $a_4$    | $a_5$    | $b_0$   | $b_1$   | $b_2$    | $R^2$   |
|----------|----------|---------|----------|----------|----------|---------|---------|----------|---------|
| -1080.94 | -222.048 | 218.153 | -82.9859 | 21.84914 | -2.14645 | 8.99023 | 0.49194 | -0.26413 | 0.99993 |

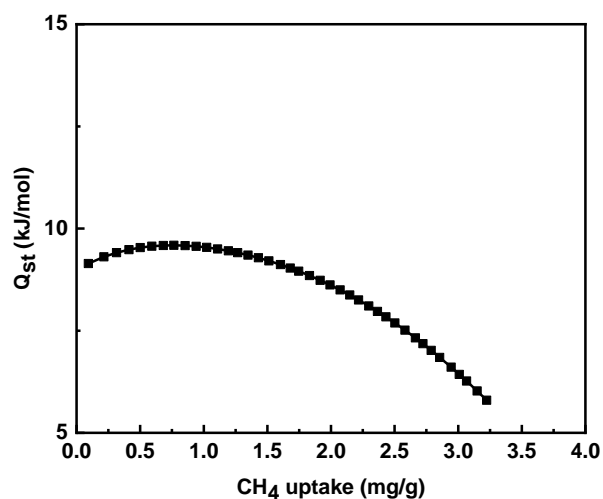

**Figure S61.** Isosteric Heat of CH<sub>4</sub> Adsorption of **H-COF**.

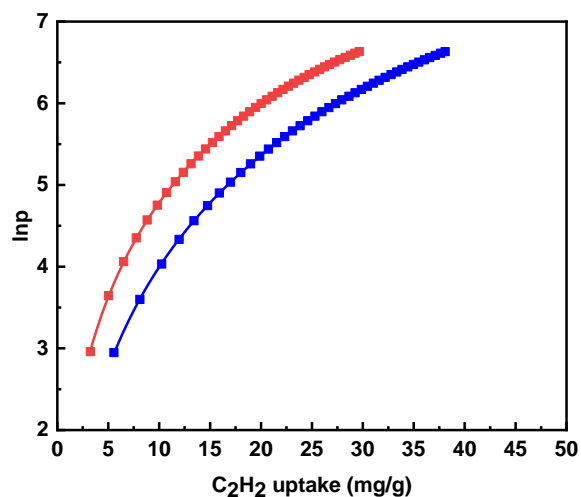

**Figure S62.** Virial Analysis of C<sub>2</sub>H<sub>2</sub> Adsorption Isotherms of **H-COF** at 273 K (blue) and 295 K (red).

**Table S21.** Virial Equation Fitting Results of C<sub>2</sub>H<sub>2</sub> Adsorption of **H-COF**.

| $a_0$    | $a_1$    | $a_2$    | $a_3$   | $a_4$    | $a_5$    | $b_0$   | $b_1$    | $b_2$    | $R^2$   |
|----------|----------|----------|---------|----------|----------|---------|----------|----------|---------|
| -3549.93 | 81.83462 | -2.45322 | 0.10993 | -0.00223 | 1.83E-05 | 13.2881 | -0.08144 | -0.00204 | 0.99999 |

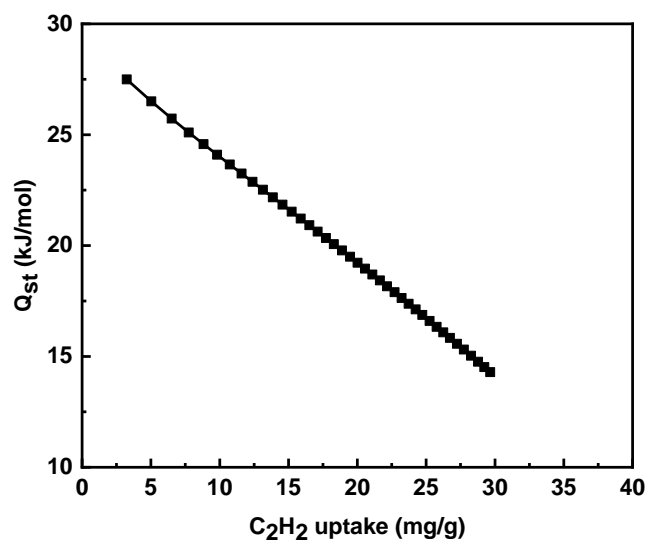

**Figure S63.** Isosteric Heat of CH<sub>4</sub> Adsorption of **H-COF**.



## 12. TEM image of AzoCOF

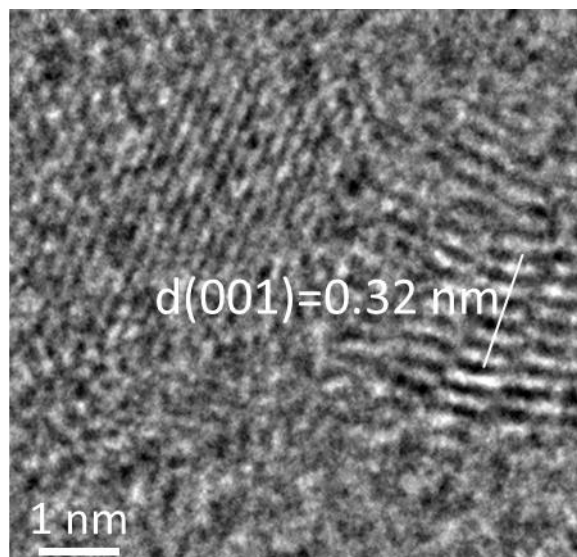

**Figure S64.** TEM Image of **Tg-AzoCOF**.

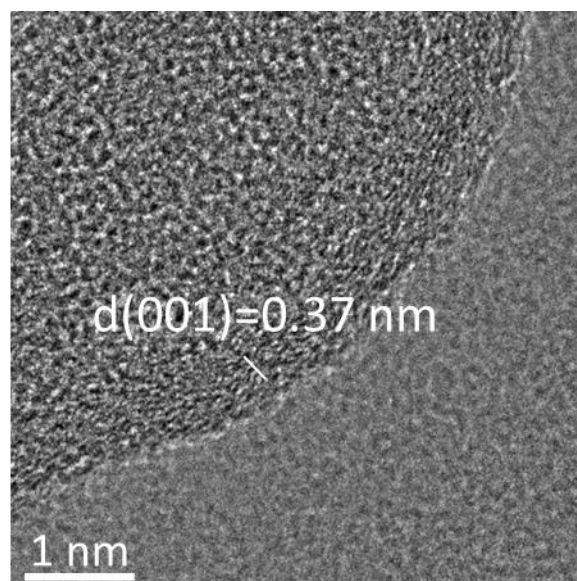

**Figure S65.** TEM Image of **H-AzoCOF**.

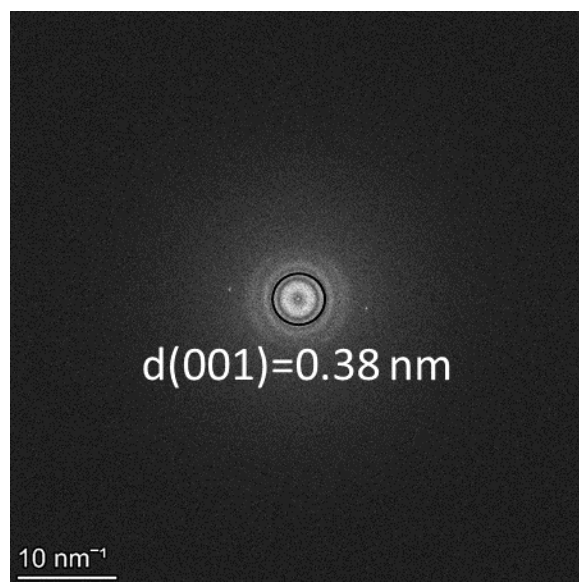

**Figure S66.** SAED Image of  $C_{10}$ -AzoCOF.

### 13. NMR spectra of new compounds

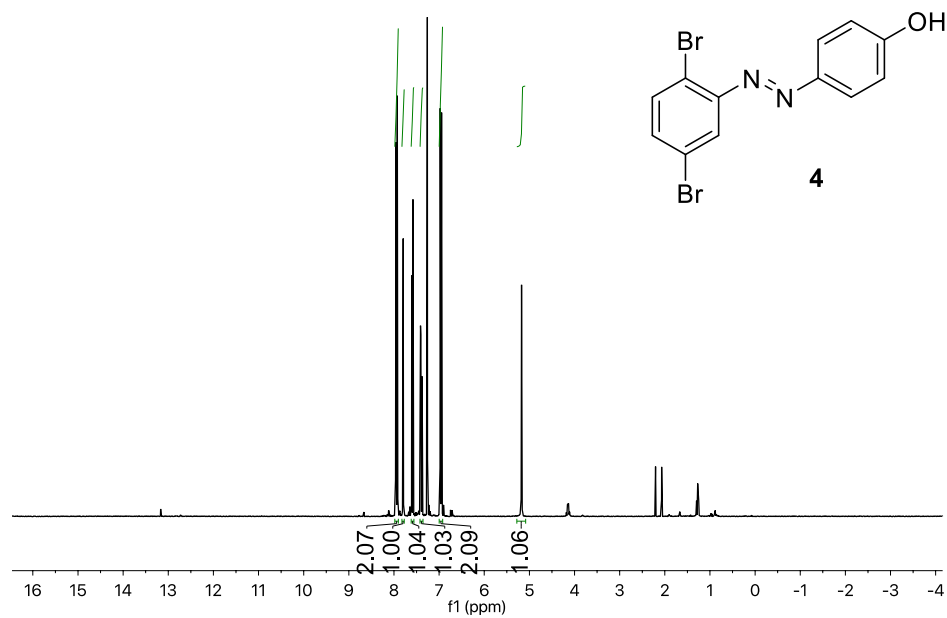

**Figure S67.** HNMR of Compound **4** in  $CDCl_3$

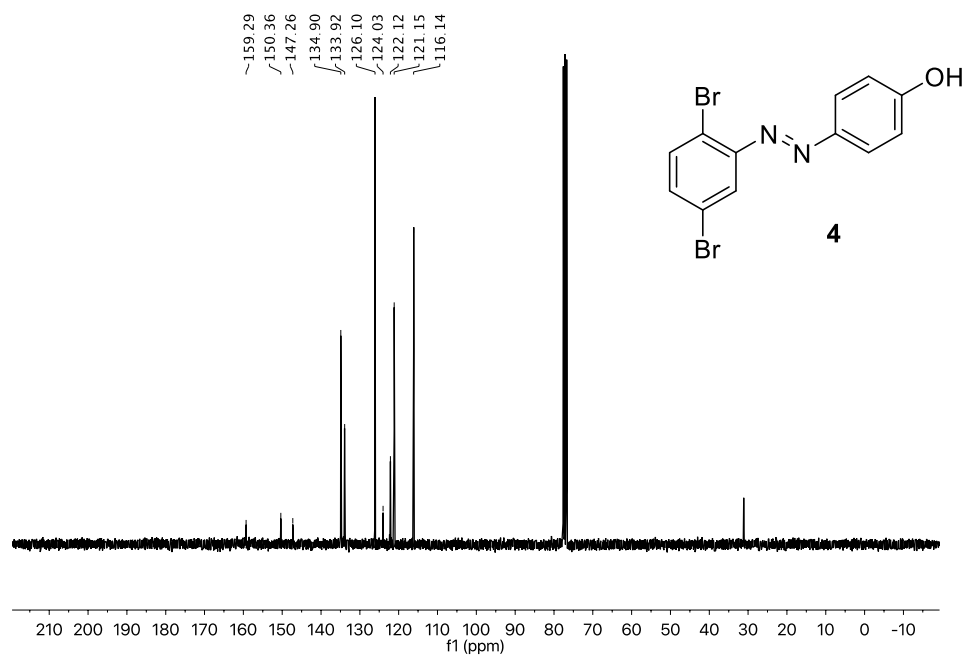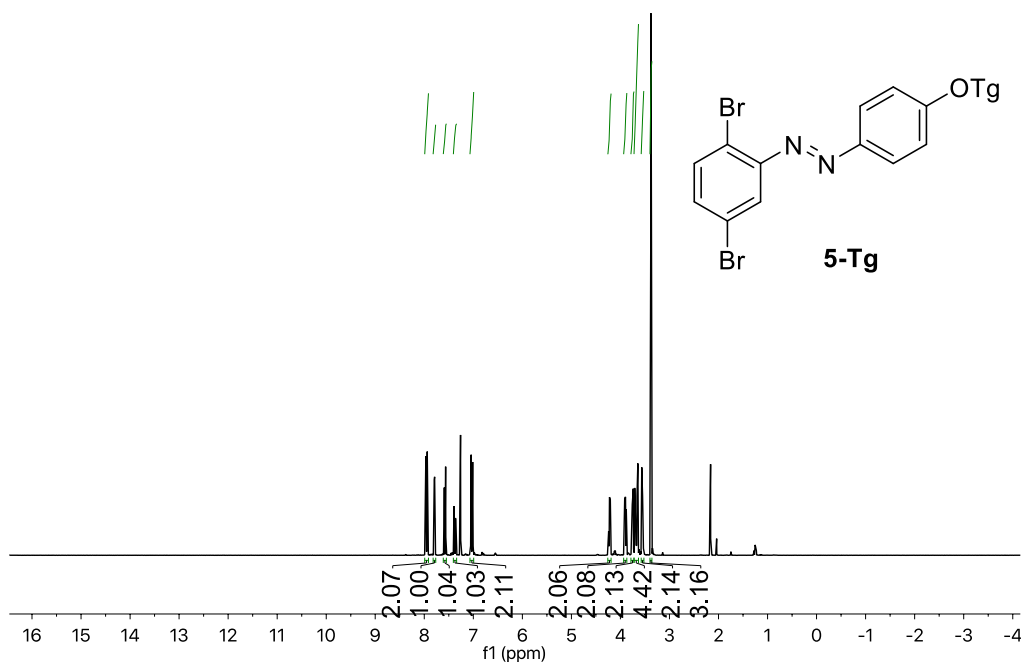

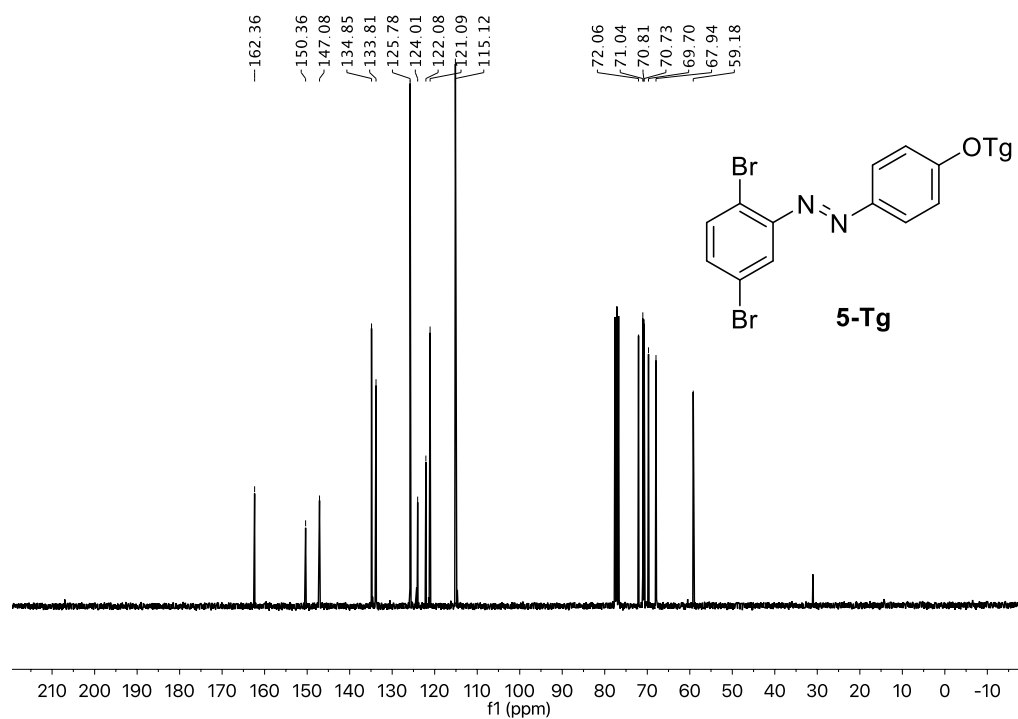

**Figure S70.** <sup>13</sup>CNMR of Compound **5-Tg** in CDCl<sub>3</sub>

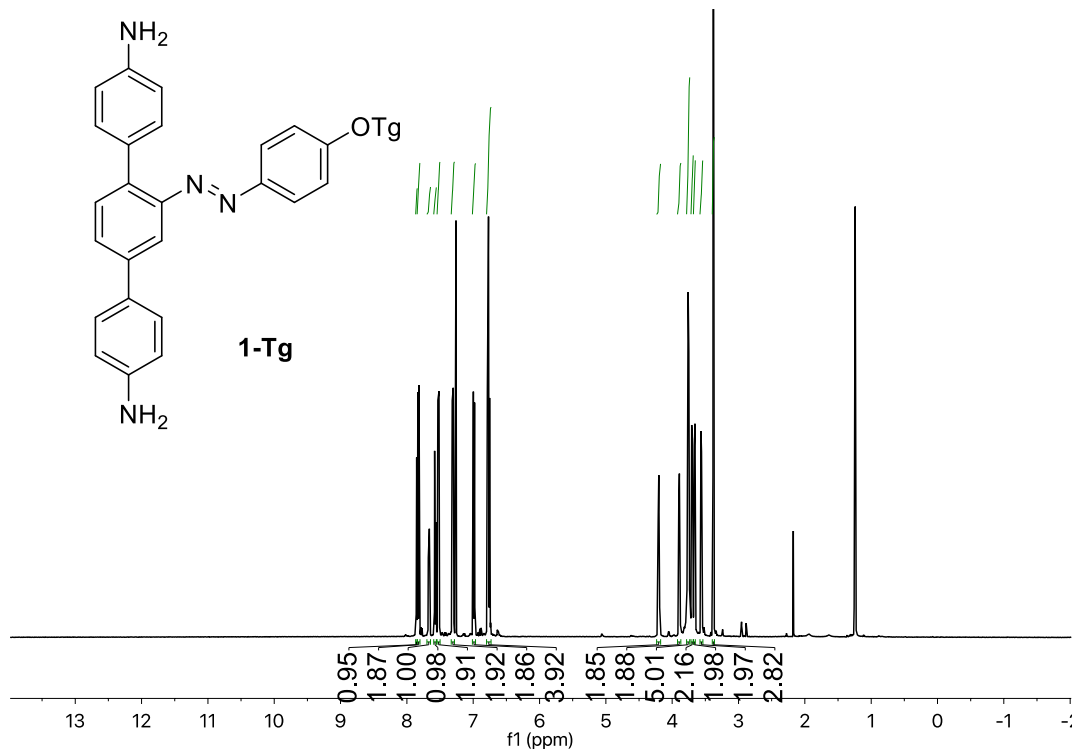

**Figure S71.** <sup>1</sup>H NMR of Compound **1-Tg** in CDCl<sub>3</sub>

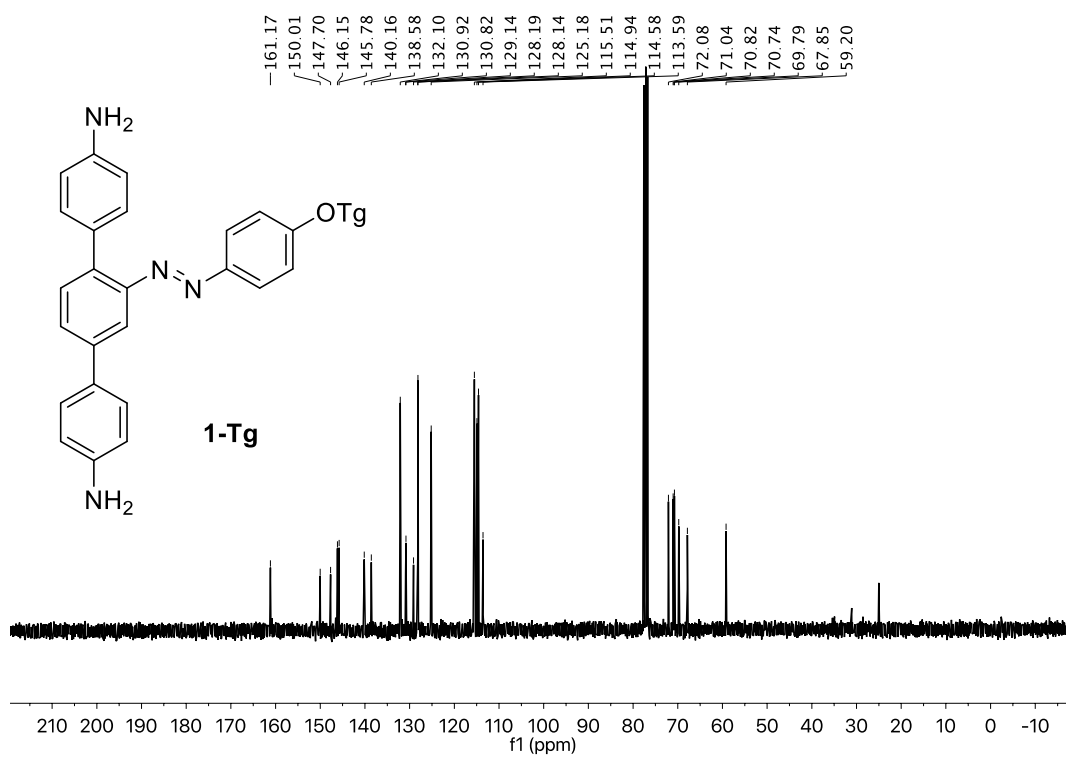

**Figure S72.** <sup>13</sup>CNMR of Compound **1-Tg** in CDCl<sub>3</sub>

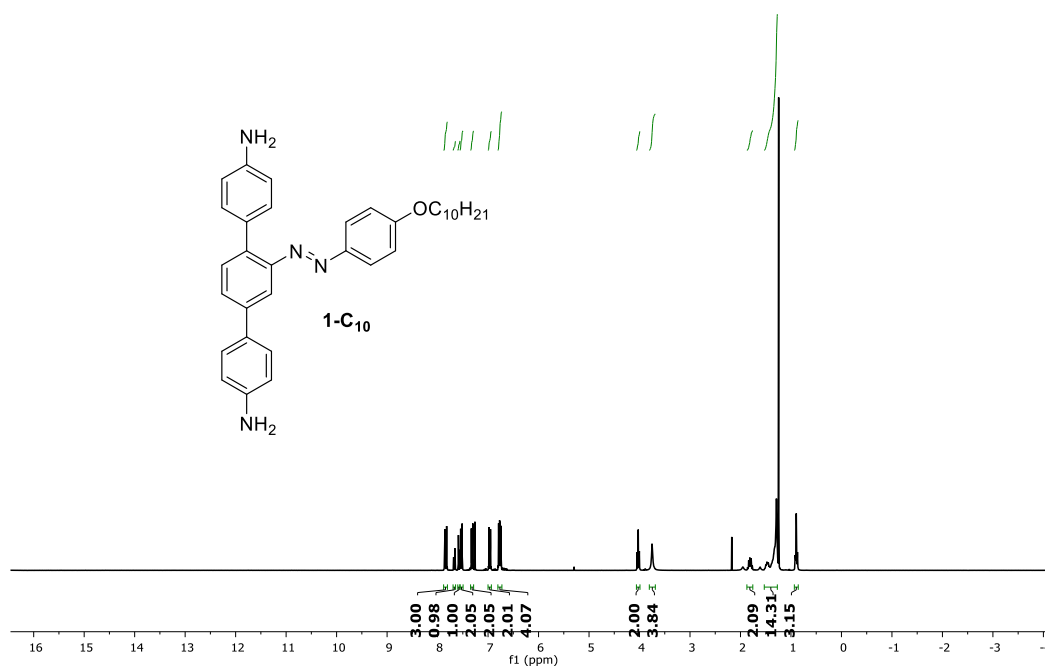

**Figure S73.** <sup>1</sup>H NMR of Compound **1-C<sub>10</sub>** in CDCl<sub>3</sub>

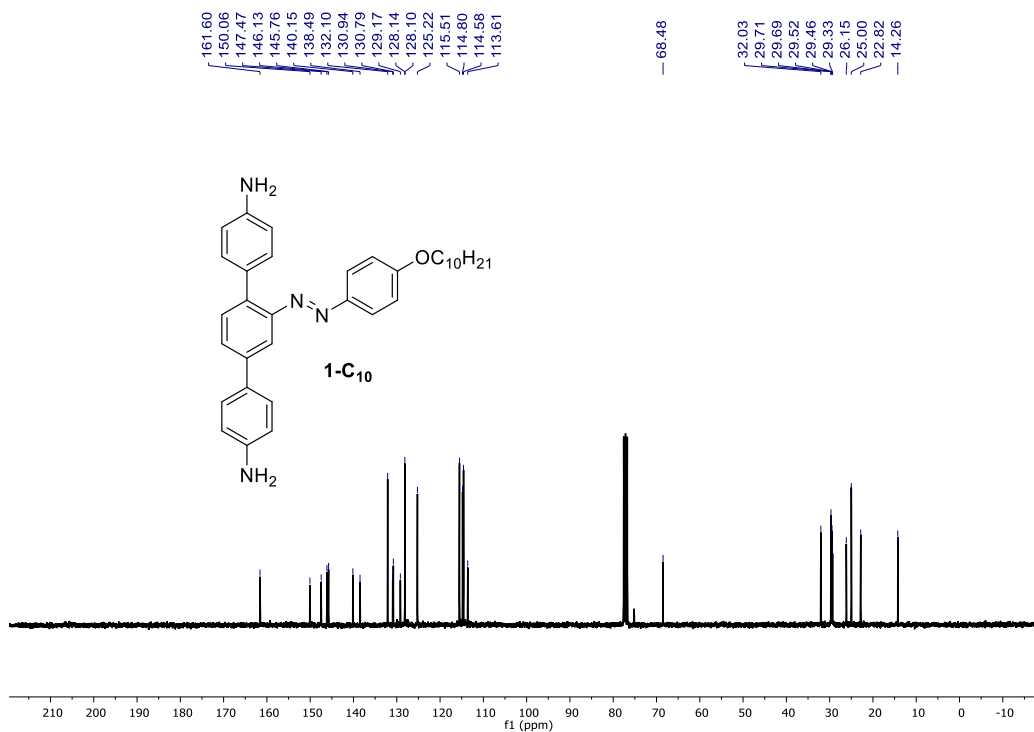

**Figure S74.** <sup>13</sup>CNMR of Compound **1-C<sub>10</sub>** in CDCl<sub>3</sub>

## Reference

1. Zhu, Y.; Zhang, W., Reversible Tuning of Pore Size and CO<sub>2</sub> Adsorption in Azobenzene Functionalized Porous Organic Polymers. *Chem. Sci.* **2014**, *5* (12), 4957-4961.
2. Zhang, M.; Li, L.; Lin, Q.; Tang, M.; Wu, Y.; Ke, C., Hierarchical-Coassembly-Enabled 3D-Printing of Homogeneous and Heterogeneous Covalent Organic Frameworks. *J. Am. Chem. Soc.* **2019**, *141* (13), 5154-5158.
3. Wei, T.; Jung, J. H.; Scott, T. F., Dynamic Covalent Assembly of Peptoid-Based Ladder Oligomers by Vernier Templating. *J. Am. Chem. Soc.* **2015**, *137* (51), 16196-16202.
